1 **Repurposing diphenylbutylpiperidine-class antipsychotic drugs for host-**  
2 **directed therapy of *Mycobacterium tuberculosis* and *Salmonella enterica***  
3 **infections**

4 Heemskerk MT<sup>1</sup>, Korbee CJ<sup>1</sup>, Esselink J<sup>1</sup>, Carvalho dos Santos C<sup>1,2</sup>, van Veen S<sup>1</sup>, Gordijn IF<sup>1</sup>,  
5 Vrieling F<sup>1</sup>, Walburg KV<sup>1</sup>, Engele CG<sup>1</sup>, Dijkman K<sup>3</sup>, Wilson L<sup>1</sup>, Verreck FAW<sup>3</sup>, Ottenhoff  
6 THM<sup>1\*</sup> and Haks MC<sup>1\*</sup>.

7 <sup>1</sup>*Department of Infectious Diseases, Leiden University Medical Center, Leiden, The*  
8 *Netherlands.* <sup>2</sup>*Laboratório Especial de Desenvolvimento de Vacinas, Instituto Butantan, São*  
9 *Paulo, Brazil.* <sup>3</sup>*TB research group, Department of Parasitology, Biomedical Primate Research*  
10 *Centre, Rijswijk, The Netherlands.*

11 \* *contributed equally.*

12

13

14

15 Corresponding author: Tom HM Ottenhoff  
16 Dept. of Infectious Diseases  
17 Leiden University Medical Center (LUMC)  
18 Albinusdreef 2  
19 2333 ZA Leiden  
20 The Netherlands  
21 Tel: +31 71 526 2620  
22 E-mail: [t.h.m.ottenhoff@lumc.nl](mailto:t.h.m.ottenhoff@lumc.nl)  
23 ORCID ID: 0000-0003-3706-3403

24

25

26 Running title: (5-6 words) Novel HDT drugs for Tuberculosis

## 27 **Abstract**

28 The persistent increase of multidrug-resistant (MDR) *Mycobacterium tuberculosis* (*Mtb*)  
29 infections negatively impacts Tuberculosis (TB) treatment outcomes. Host-directed therapies  
30 (HDT) pose an complementing strategy, particularly since *Mtb* is highly successful in evading  
31 host-defense by manipulating host-signaling pathways. Here, we screened a library containing  
32 autophagy-modulating compounds for their ability to inhibit intracellular *Mtb*-bacteria. Several  
33 active compounds were identified, including two drugs of the diphenylbutylpiperidine-class,  
34 Fluspirilene and Pimozide, commonly used as antipsychotics. Both molecules inhibited  
35 intracellular *Mtb* in pro- as well as anti-inflammatory primary human macrophages in a host-  
36 directed manner and synergized with conventional anti-bacterials. Importantly, these inhibitory  
37 effects extended to MDR-*Mtb* strains and the unrelated intracellular pathogen, *Salmonella*  
38 *enterica* serovar Typhimurium (*Stm*). Mechanistically Fluspirilene and Pimozide were shown  
39 to regulate autophagy and alter the lysosomal response, partly correlating with increased  
40 bacterial localization to autophago(lyso)somes. Pimozide's and Fluspirilene's efficacy was  
41 inhibited by antioxidants, suggesting involvement of the oxidative-stress response in *Mtb*  
42 growth control. Furthermore, Fluspirilene and especially Pimozide counteracted *Mtb*-induced  
43 STAT5 phosphorylation, thereby reducing *Mtb* phagosome-localized CISH that promotes  
44 phagosomal acidification.

45 In conclusion, two approved antipsychotic drugs, Pimozide and Fluspirilene, constitute highly  
46 promising and rapidly translatable candidates for HDT against *Mtb* and *Stm* and act by  
47 modulating the autophagic/lysosomal response by multiple mechanisms.

48

49 Keywords: (5 or 6)

50 **Tuberculosis, HDT, Fluspirilene, Pimozide, autophagy, lysosomal acidification, human**  
51 **macrophages**

## 52 **Introduction**

53 Tuberculosis (TB), an infectious disease caused by the pathogen *Mycobacterium tuberculosis*  
54 (*Mtb*), generally manifests as pulmonary disease, although any other organ can be affected.  
55 Infection is transmitted by aerosol borne *Mtb* which is phagocytosed by alveolar macrophages  
56 [1]. Currently, 23% of the world's population is estimated to be latently infected with the  
57 bacillus, from which around 5-10% will progress towards developing active disease during  
58 their lifetime [2]. In 2019, this led to around 10 million new TB cases, and an unacceptable  
59 number of over 1.4 million deaths [2]. Major efforts addressing new TB vaccine candidates are  
60 in progress [3], mainly because the only TB vaccine currently available, Bacillus Calmette-  
61 Guérin (BCG) can protect infants against severe forms of TB, but is clearly insufficient in  
62 preventing pulmonary TB in adults [4].

63 Another major class of human pathogens is the genus of *Salmonella*, which contains  
64 several serovars that cause significant global morbidity and mortality. Typhoid and paratyphoid  
65 fever are caused by the *Salmonella enterica* serotype Typhi and Paratyphi, respectively, while  
66 nontyphoidal salmonellosis (gastroenteritis) is related to other serovars, such as *Salmonella*  
67 *enterica* serovar Typhimurium (*Stm*) [5]. More than a billion people are affected annually by  
68 these infections, leading to several hundreds of thousands of deaths [5, 6].

69 A major difficulty in TB control is the increase in infections with MDR- and extensive-  
70 drug resistant TB (XDR-TB), with only 39% being treated successfully in case of the latter [2].  
71 Also, the emergence of drug-resistant *Salmonella* is a major concern, urging the development  
72 of new therapeutics [7]. Although numerous antibiotics against TB are currently in clinical  
73 trials and a few new antibiotics for the treatment of MDR-TB and XDR-TB, Bedaquilin,  
74 Linezolid and Pretomanid [8, 9], have recently been approved, several reasons encourage the  
75 search for alternative treatment strategies [10]. Barriers such as toxicity, long treatment  
76 duration, high costs and social stigma are hampering treatment adherence, thus contributing to



77 the emergence of antibiotic resistance [11]. Additionally, the inevitable emergence of future  
78 resistance against new antibiotics will negatively impact the global goal of eradicating TB,  
79 prompting the need for complementary strategies. Host-directed therapy (HDT) might prove a  
80 successful contributor towards this goal since it is expected to shorten treatment duration, has  
81 the potential to synergize with anti-bacterial therapy, could eradicate dormant bacteria which  
82 often escape conventional antibiotic treatment, and should be equally effective against drug-  
83 susceptible and drug-resistant *Mtb* [12]. An additional advantage is that bacterial resistance  
84 against HDT is unlikely to be a problem because single bacterial mutations will be insufficient  
85 to counteract multiple host mechanisms simultaneously [13]. As a first step towards HDT, drug  
86 repurposing is an attractive strategy because it could rapidly create a pipeline for new treatment  
87 modalities [14].

88         The reason for *Mtb*'s persistence in human host cells is thought to primarily be due to  
89 its ability to modify host signaling and effector pathways to its own advantage. Upon the first  
90 contact with phagocytic cells, host cell manipulation is initiated by using extracellular  
91 receptors, for example the induction of anti-inflammatory IL-10 via TLR2 and the reduction of  
92 pro-inflammatory cytokine production via a pathway initiated by the binding of mycobacterial  
93 mannose-capped lipoarabinomannan to the mannose receptor [15, 16]. Following  
94 phagocytosis, *Mtb* halts the process of phagosome maturation by preventing fusion with  
95 lysosomes [17]. Additionally, the bacterium induces the depletion of the vacuolar ATPase (v-  
96 ATPase) from the *Mtb* phagosome, which results in decreased lysosomal acidification and  
97 bacterial degradation and therefore decreased antigen processing and antigen presentation,  
98 impairing both innate and adaptive immune responses [18]. Furthermore, the mycobacterial  
99 secretion machinery, such as the ESAT-6 secretion system-1 (ESX-1) encoded by the region  
100 of difference 1 (RD1) that is present in virulent *Mtb* strains but absent from BCG, is of vital  
101 importance in manipulating host defense mechanisms targeting the bacterium, exemplified by

102 the inhibition of autophagy by ESX-1 secretion-associated protein B (EspB) [19, 20].  
103 *Salmonellae* also possess numerous mechanisms through which it manipulates infected host  
104 cells, including the activation of the host kinase Akt1 to inhibit phagosomal maturation via the  
105 Akt1/AS160 pathway [21]. Thus, numerous bacterial effector molecules, including  
106 constituents of the bacterial cell wall, can impair the host cell response and promote the  
107 bacteria's survival.

108 Various studies, including our own, have aimed to identify druggable host target  
109 molecules for HDT [22-25]. Many of these studies underscored the importance of autophagy  
110 in controlling the intracellular *Mtb* lifecycle [25-27]. Autophagy regulates cellular homeostasis  
111 through recycling intracellular cargo, including protein aggregates, damaged organelles and  
112 intracellular pathogens, and delivering these to lysosomes for destruction [28]. Autophagy  
113 selectively targeting intracellular pathogens, also termed xenophagy, has been shown to restrict  
114 replication and survival of both *Mtb* and *Salmonellae* [29], and is activated by various host  
115 molecules, such as IFN- $\gamma$  [30], TNF- $\alpha$  [31], and extracellular DNA sensor stimulator of  
116 interferon genes (STING) [32], for which we showed the DNA damage-regulated autophagy  
117 modulator 1 (DRAM1) to play an important role [27]. Several small molecule activators of  
118 autophagy have been reported to lower intracellular *Mtb* burden, including metformin, statins,  
119 nitazoxanide, gefitinib and imatinib [14].

120 Although metformin treatment of patients suffering from diabetes mellitus (DM) lowered the  
121 prevalence of latent tuberculosis infection (LTBI) [33], it failed to show an anti-TB effect in  
122 DM patients with pulmonary active TB [34, 35]. Statins have similarly been shown to lower  
123 LTBI prevalence [33], but in addition have pleiotropic effects on the host response, which can  
124 both positively and negatively impact treatment outcome [36]. Nitazoxanide has been shown  
125 to have host-directed activity against *Mtb* by inducing autophagy, although it also has direct  
126 antimicrobial activity [37]. Tyrosine kinases, including those sensitive to Imatinib such as

127 ABL1, have been found to play a role in *Mtb* infection by several groups including ours [22,  
128 38, 39]. Corroborating these findings, Imatinib has been shown to display anti-mycobacterial  
129 activity *in vivo* in mice [40] and is currently being evaluated in a phase 2 trial.

130         Drugs with efficacy towards controlling intracellular infections with low toxicity are  
131 still in short supply. Here, we screened a library of compounds with defined autophagy-  
132 inducing or -inhibitory activity using our previously described, human cell based (*Mtb*-  
133 MelJuSo) intracellular infection model [22]. Several promising candidates were identified,  
134 among which two antipsychotic drugs of the diphenylbutylpiperidine-class [41], Fluspirilene  
135 and Pimozide, were found as particularly interesting hits.

136         We found that Fluspirilene and Pimozide employ multiple mechanisms converging  
137 mostly on the autophagosomal/lysosomal response pathway to control different species of  
138 intracellular bacteria. Pimozide was particularly able to induce reactive oxygen species (ROS)  
139 which are of vital importance in the host defense response. Furthermore, Fluspirilene and  
140 particularly Pimozide inhibited STAT5-dependent *Mtb*-induced CISH-mediated degradation  
141 of phagosomal v-ATPase, underscoring the feasibility of targeting this recently uncovered  
142 mechanism. In conclusion we have uncovered potent HDT activity of two antipsychotics  
143 against (drug resistant) intracellular *Mtb* and *Stm* in human cells.

## 144 **Materials and methods**

### 145 **Chemicals**

146 The Screen-Well Autophagy Library version 1.2 ([http://www.enzolifesciences.com/BML-](http://www.enzolifesciences.com/BML-2837/screen-well-autophagy-library/)  
147 [2837/screen-well-autophagy-library/](http://www.enzolifesciences.com/BML-2837/screen-well-autophagy-library/)) was purchased from Enzo Life Sciences, Brussels,  
148 Belgium. H-89 diHCl (H-89), Fluspirilene, Pimozide, Ebselen, NG-Methyl-L-arginine acetate  
149 salt (L-NMMA), MitoTEMPO, Phorbol 12-myristate 13-acetate (PMA), N-acetyl cysteine  
150 (NAC), tert-butylhydroperoxide (TBHP) and Rifampicin were purchased from Sigma-Aldrich,  
151 Zwijndrecht, The Netherlands. Torin-1 and Isoniazid were purchased from SelleckChem,  
152 Munich, Germany. Hygromycin B was acquired from Life Technologies-Invitrogen, Bleiswijk,  
153 The Netherlands and Gentamicin sulfate was bought from Lonza BioWhittaker, Basel,  
154 Switzerland.

155

### 156 **Antibodies**

157 Rabbit anti-phospho-STAT5 (RRID:AB\_823649), rabbit anti-CISH (RRID:AB\_11178524)  
158 and rabbit polyclonal anti-TFEB (RRID:AB\_11220225) were all bought from Cell Signaling  
159 Technology, Leiden, The Netherlands. Phalloidin-iFluor 647 and Phalloidin-iFluor 405 were  
160 obtained from Abcam, Cambridge, United Kingdom. Goat anti-rabbit IgG (H+L)  
161 AlexaFluor647 conjugate (RRID:AB\_2536101) was purchased from ThermoFisher Scientific,  
162 Breda, The Netherlands.. Anti-human CD11b-PE (RRID:AB\_395789) and anti-human CD1a-  
163 BV605 (RRID:AB\_2741933) were acquired from BD BioSciences, Vianen, The Netherlands  
164 and anti-human CD14-FITC (RRID:AB\_830677) and anti-human CD163-AF647  
165 (RRID:AB\_2563475) from BioLegend, San Diego, CA, USA.

166

### 167 **Cell culture**

168 HeLa and MelJuSo cell lines were maintained at 37°C/5% CO<sub>2</sub> in Gibco Iscove's Modified  
169 Dulbecco's Medium (IMDM, Life Technologies-Invitrogen) supplemented with 10% fetal  
170 bovine serum (FBS; Greiner Bio-One, Alphen a/d Rijn, The Netherlands), 100 units/ml  
171 Penicillin and 100 µg/ml Streptomycin (both Life Technologies-Invitrogen) (complete IMDM)  
172 as described previously [22, 23].

173 Buffy coats were obtained from healthy donors after written informed consent (Sanquin Blood  
174 Bank, Amsterdam, The Netherlands). Peripheral blood mononuclear cells (PBMCs) were  
175 purified using density gradient centrifugation over Ficoll-Paque and monocytes isolated with  
176 subsequent CD14 MACS sorting (Miltenyi Biotec, Bergisch Gladsbach, Germany) as  
177 described previously [22, 23]. Monocytes were differentiated into pro-inflammatory (Mφ1) or  
178 anti-inflammatory (Mφ2) macrophages with 5 ng/ml of granulocyte-macrophage colony-  
179 stimulating factor (GM-CSF; Life Technologies-Invitrogen) or 50 ng/ml macrophage colony-  
180 stimulating factor (M-CSF; R&D Systems, Abingdon, UK), respectively, for 6 days with a  
181 cytokine boost at 3 days, as previously reported [42]. Cells were cultured at 37°C/5% CO<sub>2</sub> in  
182 Gibco Roswell Park Memorial Institute (RPMI) 1640 medium or RPMI 1640 (Dutch modified)  
183 (Life Technologies-Invitrogen) supplemented with 10% FBS and 2 mM L-alanyl-L-glutamine  
184 (GlutaMAX) (PAA, Linz, Austria), 100 U/ml penicillin and 100 µg/ml streptomycin (complete  
185 RPMI) at a density of 1x10<sup>6</sup> cells per ml in T75 flasks (Sigma-Aldrich). Macrophages were  
186 harvested using Trypsin-EDTA 0.05% (ThermoFisher Scientific) and scraping and  
187 macrophage differentiation was evaluated by cell surface marker expression of CD11b, CD1a,  
188 CD14 and CD163 implementing flow cytometry and by quantification of IL-10 and IL-12p40  
189 secretion using ELISA following 24-hour stimulation in the presence or absence of 100 ng/ml  
190 of lipopolysaccharide (LPS; InvivoGen, San Diego, United States).

191 Bronchoalveolar lavage (BAL) samples from purpose-bred, Indian-type rhesus  
192 macaques in the present study, were used as they were available occasionally, when an animal

193 happened to be indicated for ketamine-sedation and euthanasia for veterinary and animal  
194 welfare reason. Thus, the availability of sample was exploited as it occurred, beyond any legal  
195 requirement for prior approval of protocol as there was no pre-existing study plan nor any  
196 discomfort afflicted to animals for the sake of a research objective. Using a bronchoscope for  
197 instillation and recovery, cells were harvested by flushing with 3 consecutive volumes of 20  
198 mL of sterile, pre-warmed, isotonic saline solution. Samples were immediately put on ice and  
199 kept cold until further processing. To isolate the cellular fraction, the BAL was filtered over a  
200 100 µm filter and spun down at 400g for 10 min at 4°C. To enrich BAL cells for alveolar  
201 macrophages (AMφ), BAL cells were resuspended in complete RPMI and incubated for 4  
202 hours at 37°C/5% CO<sub>2</sub> in a T75 flask after which non-adherent cells were discarded. Adherent  
203 cells were washed with PBS and harvested using Trypsin-EDTA 0.05% and scraping. Cells  
204 were counted using Türk solution, spun down by centrifugation at 400g for 10 min,  
205 resuspended in complete RPMI and seeded at 300,000 per ml for downstream application. NHP  
206 samples were obtained at the Biomedical Primate Research Centre (BPRC), Rijswijk, the  
207 Netherlands. BPRC is licensed by the Dutch authority to breed non-human primates and to use  
208 them for research in areas of life-threatening and disabling diseases without suitable  
209 alternatives. BPRC complies to all relevant legislation with regard to the use of animals in  
210 research; the Dutch 'Wet op de Dierproeven' and the European guideline 2010/63/EU. BPRC  
211 is AAALAC accredited since 2012.

212

### 213 **Bacterial infection of cells**

214 *Mtb* (wild-type H37Rv or DsRed-expressing H37Rv) [22] was cultured in Difco Middlebrook  
215 7H9 broth (Becton Dickinson, Breda, the Netherlands) supplemented with 10% ADC (Becton  
216 Dickinson), 0.05% Tween 80 (Sigma-Aldrich), and with the addition of 50 µg/ml Hygromycin  
217 B in the case of DsRed-expressing H37Rv. *Mtb* suspensions were prepared from a running *Mtb*

218 culture, which was one day prior to infection diluted to a density corresponding with early log-  
219 phase growth (OD600 of 0.25). *Stm* strain SL1344 was cultured in Difco lysogeny broth (LB)  
220 (Becton Dickinson). *Stm* was grown overnight in LB, subsequently diluted 1:33 in fresh LB  
221 and used after approximately 3 hours of incubation, when log-phase growth was achieved  
222 (OD600 of 0.5). Bacteria (or liquid broth at equal v/v for mock-infection) were diluted in  
223 complete IMDM or complete RPMI without antibiotics for infecting cell lines or primary cells,  
224 respectively. We consistently used a multiplicity of infection (MOI) of 10 for both strains. Cell  
225 lines and primary cells, which had been seeded at a density of 10,000 or 30,000 cells per well,  
226 respectively, in 96-well flat-bottom plates 1 day prior to infection, were inoculated with 100  $\mu$ l  
227 of the bacterial suspension. Cells were subsequently centrifuged for 3 min at 800 rpm and  
228 incubated at 37°C/5% CO<sub>2</sub> for 20 min in case of *Stm* infection or 60 min in case of *Mtb*  
229 infection. Extracellular bacteria were then washed away with culture medium containing 30  
230  $\mu$ g/ml Gentamicin sulfate, incubated for 10 min at 37°C/5% CO<sub>2</sub>, followed by replacement  
231 with medium containing 5  $\mu$ g/ml Gentamicin sulfate and, if indicated, chemical compounds  
232 until readout. MOI of the bacterial inoculum was confirmed by a standard colony-forming unit  
233 (CFU) assay.

234

### 235 **Chemical compound treatment**

236 Cells were treated for 24 hours, unless indicated otherwise, with chemical compound at a  
237 concentration of 10  $\mu$ M, unless indicated otherwise, or DMSO at equal v/v in medium  
238 containing 5  $\mu$ g/ml Gentamicin sulfate. Treatment regimens were designed not to exceed  
239 DMSO solvent end concentrations of 0.2%.

240

### 241 **Colony-forming unit (CFU) assay**

242 Cells were lysed in H<sub>2</sub>O containing 0.05% SDS (ThermoFisher Scientific). Lysates of *Mtb*-  
243 infected cells were serially diluted in steps of 5-fold in 7H9 broth and 10 µl droplets were  
244 spotted onto square Middlebrook 7H10 agar plates. Plates were incubated at 37°C for 12-14  
245 days and bacterial colonies quantified using a microscope with a magnification of 2.5 times to  
246 enhance early detection of bacterial growth. Lysates of *Stm*-infected cells were serially diluted  
247 in LB broth, thereafter 10 µl droplets were spotted onto square LB agar plates and incubated  
248 overnight at 37°C.

249

### 250 **Liquid bacterial growth inhibition assay**

251 *Stm* or *Mtb* cultures in logarithmic growth phase were diluted to an OD<sub>600</sub> of 0.1 in LB broth  
252 or 7H9 broth respectively, of which 200 µl per flat-bottom 96-well was incubated with  
253 chemical compound, antibiotic or DMSO at equal v/v at indicated concentrations. *Stm* growth  
254 was measured after overnight incubation at 37°C, while *Mtb* growth was evaluated for 10 days  
255 of incubation at 37°C. Absorbance was measured by optical density at 550 nm on a Mithras  
256 LB 940 plate reader (Berthold Technologies, Bad Wildbad, Germany) while shaking between  
257 measurements.

258

### 259 **Flow cytometry**

260 Infected cells were at experimental endpoint washed with 100 µl of PBS and detached by  
261 incubation in 50 µl of Trypsin-EDTA 0.05% for five minutes. Single cell suspensions were  
262 fixed by adding 100 µl of 1.5% paraformaldehyde and incubated for 60 min at 4°C. Acquisition  
263 was performed using a BD FACSLytic™ Flow Cytometer equipped with BD FACSuite  
264 software (BD Biosciences). Data was analyzed using FlowJo software v10.

265

### 266 **Cell viability assay**



267 Cells seeded at a density of 30,000 cells/well in 96-well flat-bottom plates were stained in 50  
268  $\mu$ l RPMI without phenol red (Life Technologies-Invitrogen) containing propidium iodide (PI)  
269 (1:500, Sigma-Aldrich) and 100  $\mu$ g/ml of Hoechst 33342 (Sigma-Aldrich). Cells were  
270 incubated at room temperature (RT) for 5 min. Per well 3 images were taken using a Leica  
271 AF6000 LC fluorescence microscope combined with a 20x dry objective. The number of dead  
272 cells (positive for PI) versus total number of adherent cells (positive for Hoechst) was  
273 quantified using CellProlifer version 3.0.0 [55].

274

### 275 **Immunostaining**

276 Cells were seeded on poly-d-lysine coated glass-bottom (no. 1.5) 96-well plates (MatTek,  
277 Ashland, Massachusetts, United States), pre-washed with PBS, at a density of 30,000 per well.  
278 After overnight incubation, cells were infected with DsRed-expressing *Mtb* at a MOI of 10 as  
279 previously described. At the indicated experimental endpoint, cells were washed three times  
280 with PBS and fixed for 60 min at RT using 1% methanol-free EM-grade formaldehyde  
281 (ThermoFisher Scientific) diluted in PBS. Cells were washed with PBS and remaining reactive  
282 formaldehyde was quenched using 100  $\mu$ l of Glycine solution (1.5 mg/ml in PBS) for 10 min  
283 at RT. Cells were permeabilized in 0.1% Triton-X (Sigma-Aldrich) diluted in PBS for 10 min  
284 at RT and Fc-receptors were subsequently blocked using 5% human serum (HS; Sanquin Blood  
285 bank, Amsterdam, The Netherlands) for 45 min at RT. After removal of the 5% HS, cells were  
286 stained with primary antibody diluted in 5% HS for 30 min at RT, washed three times with 5%  
287 HS and incubated with secondary antibody in 5% HS for 30 min at RT in the dark. After  
288 washing three times with 5% HS, cells were counterstained with 50  $\mu$ l of 2  $\mu$ g/ml Hoechst  
289 33342 and Phalloidin for 30 minutes at RT in the dark. Images, at least 3 per well, were  
290 acquired using a Leica TCS SP8 X WLL confocal system and 63X oil immersion objective.  
291 Hybrid detectors were used with a time gate to switch off data collection during the pulse. The

292 fluorescent dyes LysoTracker Deep Red (ThermoFisher Scientific) (75 nM) and CYTO-ID 2.0  
293 (Enzo LifeSciences) (1:500) were added to the cells 30 minutes prior to treatment endpoint.  
294 Cells were fixed at the experimental endpoint and counterstained with Hoechst and Phalloidin  
295 as described above except for permeabilization.

296 Colocalization analysis was performed as follows. Image background was subtracted  
297 using the rolling ball (20-pixel radius) algorithm with Fiji software [43]. CellProlifer 3.0.0 was  
298 used to first correct for non-homogenous illumination if necessary, then for the segmentation  
299 of both the fluorescent bacteria and marker of interest using global thresholding with intensity-  
300 based de-clumping [44]. For every experiment, segmentation was performed independently  
301 with both a range of thresholds and adaptive three-class Otsu thresholding to confirm  
302 segmentation results. Then per image the overlap of *Mtb* with marker of interest was calculated  
303 as percentage of object overlap (colocalization) or the integrated intensity of the marker of  
304 interest per single nucleus or bacterium was determined. Data in Figures 3C and 4C are shown  
305 for 4 individuals, while two donors could not be analyzed due to high background levels.

306

### 307 **Reactive oxygen species (ROS) / Reactive nitrogen species (RNS) assay**

308 Cells were seeded in complete RPMI in Corning 96-well Special Optics Flat Clear Bottom  
309 Black Polystyrene TC-Treated Microplates (Sigma-Aldrich) at a density of 40,000 per well.  
310 After overnight incubation at 37°C/5% CO<sub>2</sub>, cells were washed once with PBS and incubated  
311 with 5 μM CM-H<sub>2</sub>DCFDA (Life Technologies-Invitrogen), a general oxidative stress  
312 indicator, for 30 min at 37°C/5% CO<sub>2</sub> in phenol red free RPMI. Cells were washed twice with  
313 PBS followed by treatment with chemical compounds (10 μM) in 100 μl of complete RPMI  
314 without phenol red. 50 μM of TBHP was used as technical assay control. Oxidation of the  
315 probe yields a fluorescent adduct which presence was quantified every 5 min for 2 hours by

316 measuring fluorescence using the SpectraMax i3x at 37°C. Specific settings used were 10  
317 flashes per read with an 493/9 excitation and a 522/15 emission filter pair and a high PMT gain.  
318

### 319 **Total RNA isolation and cDNA synthesis**

320 Total RNA isolation was performed using TRIzol Reagent (Life Technologies-Invitrogen)  
321 according to the manufacturer's instructions and described previously [23]. RNA yield was  
322 quantified using a DeNovix DS-11 Spectrophotometer (ThermoFisher Scientific). Total RNA  
323 (0.5 µg) was reverse transcribed using SuperScript IV Reverse Transcriptase (Life  
324 Technologies-Invitrogen). Briefly, RNA samples were first incubated at 65°C for 5 min in the  
325 presence of 0.5 mM dNTPs and 2.5 µM oligo(dT)<sub>20</sub> (Life Technologies-Invitrogen).  
326 Subsequently, cDNA synthesis was initiated by adding a master mix containing 1x first strand  
327 buffer, 5 mM DTT, 40 U RNaseOUT (ThermoFisher Scientific) and 200 U SuperScript IV and  
328 incubating at 50-55°C for 10 min followed by inactivation of the reverse transcriptase at 80°C  
329 for 10 min.

330

### 331 **TaqMan qPCR**

332 Multiplex quantitative polymerase chain reaction (qPCR) was carried out using a QuantStudio  
333 6 Flex Real-Time PCR System (ThermoFisher Scientific) as described previously [23]. qPCR  
334 reactions were performed in a final volume of 25 µl containing 1x TaqMan Universal PCR  
335 Master Mix, No AmpErase UNG, 0.5x CISH-FAM TaqMan primers (Hs00367082\_g1,  
336 ThermoFisher Scientific), 0.5x GAPDH-VIC TaqMan primers ((Hs02758991\_g1,  
337 ThermoFisher Scientific), and 5 µl cDNA. Thermal cycling conditions were 1 cycle of 2  
338 min/50°C and 10 min/95°C, followed by 40 cycles of 15 s/95°C and 1 min/60°C. The threshold  
339 cycle (Ct) values of CISH transcripts were normalized to GAPDH by the  $2^{-\Delta\Delta CT}$  algorithm

340 method [45]. Relative expression levels were calculated by applying the formula  $((2^{-\Delta CT(\text{Target}}$   
341  $\text{gene}))/(2^{-\Delta CT(\text{GAPDH})})$ ).

342

### 343 **Statistics**

344 Statistics were performed as described previously [23]. Normal distribution of the data was  
345 tested using the Shapiro-Wilk test. If the data was normally distributed, unpaired t-test with  
346 Welch's correction or one-way ANOVA with Dunnett's multiple comparison test were applied  
347 when assessing differences between 2 and 3 or more groups of unpaired data, respectively.  
348 Normally distributed paired samples were analyzed using repeated measure (RM) one-way  
349 ANOVA with Dunnett's multiple comparison test and Geisser Greenhouse correction. Two-  
350 way ANOVA with Tukey's multiple comparison test was used when the effect of two  
351 independent variables was tested simultaneously. Assessing differences between 2 or more  
352 groups of unpaired observations from not normally distributed data was performed using  
353 Kruskal-Wallis test, while paired observations were tested using the Wilcoxon matched-pairs  
354 signed rank test with post-hoc Benjamini-Hochberg correction. Analyses were performed using  
355 GraphPad Prism 8.

356

### 357 **Data availability**

358 The datasets generated and analyzed during the current study are not deposited in external  
359 repositories but are included as supplementary file or available from the corresponding author  
360 on reasonable request.

361

## 362 **Results**

### 363 **Compounds were identified that contain autophagy-regulating activity and repurposing** 364 **potential for HDT against *Mtb* and *Stm***

365 By employing our previously described flow-cytometry-based assay using *Mtb*-infected human  
366 MelJuSo cells [22], we screened the Screen-Well Autophagy library that includes clinically  
367 approved molecules, to find new drugs with HDT activity against intracellular *Mtb*. *Mtb*-  
368 infected human cells were treated during 24h with compounds. The PKA/PKB-Akt1 inhibitor  
369 H-89 was included as a positive control based on our earlier work [21, 22]. We identified 25  
370 compounds that strongly reduced bacterial burden (<35% infected cells compared to control  
371 DMSO). From these 25 molecules we discontinued 15 because of undesirable significant host  
372 cell toxicity (cell-yield <85% after 24h treatment compared to control DMSO), and 2 because  
373 of a current lack of clinical approval (SB-216763 and Licochalcone A). Two additional  
374 compounds were not pursued further since their *in vivo* adjunct therapy potential had already  
375 been shown previously, independently validating our discovery approach (Chloroquine and its  
376 metabolite Hydroxychloroquine) [46] (**Figure 1A, and Table S1**).

377 In our effort to focus on new candidates it was of interest that 2 of the 6 remaining compounds,  
378 notably Fluspirilene and Pimozide, are structural analogues of the diphenylbutylpiperidine-  
379 class of antipsychotic drugs. Both drugs have an extensive clinical safety profile and are already  
380 for several decades used to treat multiple disorders. To explore and compare mechanistics of  
381 the analogues, we decided to focus on these two drugs only in this study, while detailed work  
382 on the other hit compounds will be described elsewhere.

383 We observed no cellular toxicity following treatment with Fluspirilene and Pimozide,  
384 while H-89 treatment affected cell numbers slightly (**Figure 1B**). To validate these initial  
385 screening results further in a physiologically more relevant *in vitro* model, we generated

386 primary GM-CSF-derived pro-inflammatory macrophages (M $\phi$ 1) and M-CSF-derived anti-  
387 inflammatory macrophages (M $\phi$ 2) [22, 42, 47], and tested the potential of the two  
388 diphenylbutylpiperidines to inhibit outgrowth of intracellular *Mtb* (using a classical colony  
389 forming unit (CFU) assay as read-out (**Figure 1C**). Both Fluspirilene and Pimozide induced a  
390 significant decrease of *Mtb* outgrowth in M $\phi$ 1 and particularly M $\phi$ 2 (median reduction of  
391 bacterial outgrowth of 22% and 41% for Fluspirilene and 35% and 73% for Pimozide,  
392 respectively) (**Figure 1C**).

393 To investigate potential broader-range applicability of Fluspirilene and Pimozide, we  
394 investigated their intracellular bacterial growth inhibitory activity against a different class of  
395 intracellular bacteria, using *Stm*-infected human M $\phi$  (**Figure 1D**). H-89 was again included as  
396 a positive control (it displays greater activity against *Stm* than *Mtb*) [21, 22]. Interestingly, both  
397 drugs vastly reduced *Stm* outgrowth (median reduction of bacterial outgrowth > 96% and >  
398 98% in M $\phi$ 1 and M $\phi$ 2, respectively), suggesting these HDT drugs could be more broadly  
399 applicable.

400 To exclude that Fluspirilene and Pimozide acted in a direct anti-bacterial manner,  
401 extracellular *Stm* and *Mtb* were treated with Fluspirilene and Pimozide in liquid broth, in equal  
402 concentrations (10  $\mu$ M) as used in the cell-based infection models. Fluspirilene and Pimozide  
403 did not affect *Mtb* or *Stm* growth, whereas control antibiotics Rifampicin (*Mtb*) and Gentamicin  
404 (*Stm*) inhibited bacterial growth (**Figures 1E and F**).

405 Taken together, we identified two clinically approved structural analogues displaying  
406 reported autophagy-inducing capacities as novel safe candidate molecules for HDT, that  
407 inhibited intracellular *Mtb* as well as *Stm* in both pro- and anti-inflammatory human primary  
408 macrophages.

409

410 **Fluspirilene and Pimozide HDT activity against intracellular *Mtb* was confirmed cross-**  
411 **species of host and mycobacterium**

412 Since HDT drugs act on host rather than bacterial targets, they should inhibit outgrowth of  
413 drug-susceptible and multi-drug resistant (MDR)-*Mtb* strains similarly. To verify this, we  
414 measured the effect of the two diphenylbutylpiperidines on CFU outgrowth in human M $\phi$ 2 (we  
415 focused on M $\phi$ 2 since we found similar efficacy in both M $\phi$ 1 and M $\phi$ 2). The cells were  
416 infected with either *Mtb* Dutch outbreak strain 2003-1128 or *Mtb* Beijing strain 16319, both  
417 MDR-*Mtb*-strains. Indeed, treatment with Fluspirilene and Pimozide significantly inhibited  
418 bacterial outgrowth of both MDR-*Mtb* strains highly efficiently (**Figure 2A**), thereby  
419 emphasizing their clinical relevance.

420 Clinical application of HDT will most likely be considered as adjunct to standard  
421 antibiotic therapy for TB [14]. Since HDT and antibiotics have different targets, we  
422 investigated whether synergistic/additive effects between these treatments could be detected.  
423 Combining either Fluspirilene or Pimozide with a suboptimal dose of Rifampicin (0.05  $\mu$ g/ml)  
424 inhibited *Mtb* outgrowth to a significantly larger extent compared to Fluspirilene, Pimozide, or  
425 Rifampicin treatment alone (**Figure 2B**). Unexpectedly, this effect was not observed when  
426 Fluspirilene and Pimozide were combined with a suboptimal dose of Isoniazid (0.4  $\mu$ g/ml)  
427 (**Figure 2C**). While not further investigated here, a possible explanation for this could be that  
428 the diphenylbutylpiperidines alter host cell processes required for Isoniazid's conversion into  
429 its active form [48].

430 To further strengthen the potential utility of Fluspirilene and Pimozide, we next tested  
431 their efficacy on *Mtb*-infected *ex vivo* non-human primate (NHP) bronchoalveolar lavage  
432 (BAL) cells which are a rich source of alveolar macrophages (AM $\phi$ ), the primary target cells  
433 for *Mtb*. Cross-species efficacy of the drugs would suggest functional conservation of their host  
434 targets as well as translate and validate our above findings in human cells. Importantly, 24-

435 hour treatment with either one of the drugs decreased outgrowth of intracellular *Mtb*. This was  
436 reflected in the reduced percentage of infected cells (**Figure 2D, left panel**), and especially in  
437 the reduced number of colony forming bacteria (**Figure 2D, middle panel**). Notably,  
438 Fluspirilene and Pimozide treatment showed no toxicity towards the *ex vivo* NHP AM $\phi$   
439 (**Figure 2D, right panel**).

440 Taken together, these results significantly strengthen the potential value of Fluspirilene  
441 and Pimozide in HDT approaches against intracellular infections, including MDR-*Mtb*  
442 bacteria, and demonstrate their activity also in (NHP) infected alveolar macrophages.

443

#### 444 **Fluspirilene and Pimozide regulate autophagy, induce a lysosomal response and enhance** 445 **bacterial presence in autophago(lyso)somes**

446 Because Fluspirilene and Pimozide are known to modulate and induce autophagy [49], we  
447 investigated this as a potential mode of action against intracellular *Mtb*. M $\phi$ 2 were infected  
448 with *Mtb*, treated for 4 hours with Fluspirilene and Pimozide, stained with CYTO-ID (a tracer  
449 that stains all autophagy-related vesicles) and visualized using confocal microscopy (**Figure**  
450 **3A, left panel**). Importantly, both Fluspirilene and Pimozide, although not statistically  
451 significant, tended to increase the CYTO-ID vesicle area and the bacterial localization in these  
452 vesicles (**Figure 3A, middle and right panel**), lending support to the involvement of  
453 autophagy in Fluspirilene and Pimozide's mode of action against intracellular *Mtb* in infected  
454 human cells.

455 To assess whether the reduction in *Mtb* outgrowth induced by Fluspirilene and  
456 Pimozide could also be associated with an increase in lysosomal activity we first examined the  
457 nuclear accumulation of transcription factor EB (TFEB), a master regulator of the coordinated  
458 lysosomal expression and regulation (CLEAR) gene network, as well as autophagy [50, 51].  
459 Nuclear intensity of TFEB was quantified in *Mtb*-infected M $\phi$ 2 after 4 hours of treatment with



460 Fluspirilene, Pimozide or Torin-1 as positive control [52], using confocal microscopy (**Figure**  
461 **3B, left panel**). A highly significant increase in nuclear TFEB was observed for both  
462 Fluspirilene and Pimozide, even to a similar extent as the positive control Torin-1 (**Figure 3B,**  
463 **right panel**). To investigate the lysosomal response in more detail we employed the lysosomal  
464 tracer LysoTracker. DsRed-*Mtb*-infected Mφ2 were treated with Fluspirilene and Pimozide for  
465 4 hours and the lysosomal area and localization of bacteria in lysosomes was quantified (**Figure**  
466 **3C, left panel**). Pimozide tended to induce an increase in lysosomal area, in contrast to  
467 Fluspirilene (**Figure 3C, middle panel**). Additionally, Fluspirilene and Pimozide induced a  
468 mild, though statistically not significant average increase in colocalization of bacteria and  
469 lysosomes compared to DMSO (**Figure 3C, right panel**).

470 Collectively, these results suggest that the lysosomal response key regulator TFEB and  
471 likely also the autophagic response are involved in enhancing host defense induced by  
472 diphenylbutylpiperidines, which restricts outgrowth of intracellular *Mtb*. Notwithstanding, the  
473 observed limited effect sizes for some of these processes suggested to us that these mechanisms  
474 likely do not fully account for the potent HDT activity of Fluspirilene and Pimozide against  
475 intracellular *Mtb*. We therefore postulated that other mechanisms of action are likely involved  
476 in the control of intracellular bacteria upon treatment with Fluspirilene and Pimozide.

477

478 **Fluspirilene and Pimozide inhibit STAT5 function and Pimozide additionally reduces the**  
479 **presence of cytokine-inducible SH2-containing protein (CISH) on *Mtb* phagosomes**

480 Because Pimozide has been reported to inhibit STAT5 function by dephosphorylation [53], and  
481 work by Queval, Song [54] recently uncovered a STAT5-mediated control of phagosomal  
482 acidification induced by *Mtb*, we explored functional inhibition of STAT5 by  
483 diphenylbutylpiperidines as a potential mode of action to control intracellular *Mtb*. First, the  
484 effect of 4-hour treatment with diphenylbutylpiperidines on nuclear presence of

485 phosphorylated STAT5 (P-STAT5) was investigated in *Mtb*-infected M $\phi$ 2 using confocal  
486 microscopy (**Figure 4A, left panel**). Both Fluspirilene and Pimozide significantly decreased  
487 the nuclear presence of P-STAT5 (**Figure 4A, middle and right panel**). To further corroborate  
488 our finding that Fluspirilene and Pimozide lowered nuclear P-STAT5 quantity and hence its  
489 transcriptional activity, we analyzed the expression levels of cytokine-inducible SH2-  
490 containing protein (*CISH*), a transcriptional target of STAT5 [55]. We confirmed the  
491 observation by Queval, Song [25] that *Mtb* infection increases *CISH* transcript levels in our  
492 *Mtb*-M $\phi$ 2 model after 4 hours (**Figure 4B**). Unexpectedly, Fluspirilene increased *CISH*  
493 transcript levels, even to a higher extent than the positive control GM-CSF [56], while  
494 Pimozide did not affect *CISH* transcript expression levels, despite the compound's' effects on  
495 P-STAT5 (**Figure 4B**). We therefore quantified colocalization of CISH protein with *Mtb*, since  
496 the presence of CISH on the *Mtb* phagosome has been associated with bacterial survival [54].  
497 Pimozide treatment caused a significant decrease of CISH fluorescence intensity per bacterium  
498 within the 4h time-period, but Fluspirilene did not clearly show a difference compared to  
499 DMSO (**Figure 4C**).

500 Taken together, these data suggest that Fluspirilene and Pimozide both decrease P-  
501 STAT5 protein levels in the nucleus. In addition, although the effects on intracellular *Mtb*  
502 bacteria did not correlate with differential expression of the STAT5 target *CISH* at the  
503 transcript level, Pimozide lowered CISH protein presence on the *Mtb* phagosome. Thus, both  
504 Fluspirilene and Pimozide likely target intracellular *Mtb* by a mechanism involving P-STAT5,  
505 which for Pimozide, but not Fluspirilene, includes routing through the CISH effector pathway.  
506 These results suggest that structurally highly related HDT compounds can nevertheless subtly  
507 differ in their mode of actions against intracellular infection.

508

509 **Pimozide induces ROS/RNS production and antioxidants impair bacterial killing by**  
510 **Pimozide as well as Fluspirilene**

511 Next to autophagy and lysosomal degradation, reactive oxygen species (ROS) and reactive  
512 nitrogen species (RNS) represent additional mechanisms that could play a key role in  
513 controlling intracellular *Mtb*. Of note, Pimozide has been reported to induce ROS production  
514 in various cell types [57-59], prompting us to explore the role of radical species in the mode of  
515 action of both Fluspirilene and Pimozide. Using a general oxidative stress indicator (CM-  
516 H2DCFDA), we measured ROS/RNS production in uninfected M $\phi$ 2 (due to biosafety level 3-  
517 restrictions) during treatment with Fluspirilene and Pimozide. Pimozide but not Fluspirilene  
518 treatment clearly increased ROS/RNS production (**Figure 5A and 5B, left panel**). To confirm  
519 that probe conversion was caused by cellular produced radical species, the probe was incubated  
520 with Pimozide in a cell-free system, which showed no significant effect (**Figure 5C**). To  
521 examine whether we could confirm the induction of ROS/RNS production by Pimozide, we  
522 added the antioxidant N-acetylcysteine (NAC) to the Pimozide treatment regimen (**Figure 5B,**  
523 **right panel**). In 7 out of 9 donors Pimozide-induced ROS/RNS production was impaired by  
524 the addition of NAC, indicating that the probe conversion indeed reflects elevated ROS/RNS  
525 production.

526 To study the importance of Pimozide-induced ROS/RNS production in its control of  
527 intracellular bacterial infection, *Mtb*-infected M $\phi$ 2 were treated with either Pimozide or  
528 Fluspirilene in combination with various ROS/RNS inhibitors, namely: NAC, Ebselen (a NOX  
529 inhibitor and glutathione peroxidase mimic [60]), MitoTEMPO (a mitochondria-targeted  
530 radical scavenger [61]), and L-NMMA (a nitric oxide synthase (NOS) inhibitor [62]) (**Figure**  
531 **5D**). NAC, and L-NMMA, but not Ebselen and MitoTEMPO, significantly inhibited the HDT  
532 effects of Pimozide (**Figure 6D, right panel**). Interestingly, we also observed a significant  
533 effect of MitoTEMPO but not NAC, L-NMMA or Ebselen, on Fluspirilene (**Figure 5D, left**

534 **panel**), indicating a -possibly differential- role for ROS/RNS in the mode of action of both  
535 Fluspirilene and Pimozide. NAC, MitoTEMPO, L-NMMA and Ebselen treated *Mtb*-infected  
536 Mφ2 all showed some reduced bacterial outgrowth, which was significant for NAC and  
537 Ebselen (**Supplementary Figure 1**), further emphasizing the role of ROS/RNS in intracellular  
538 bacterial control, which is supported by their antagonistic effect on Pimozide and Fluspirilene  
539 induced infection control.

540

541 In conclusion, we have identified two clinically approved drugs, Fluspirilene and  
542 Pimozide, which we show to have novel and significant potential as host-directed therapeutics  
543 for the treatment of intracellular bacterial pathogens such as *Mtb* and *Stm*, mechanistically  
544 operating by multiple mechanisms of action. We show that both Fluspirilene and Pimozide  
545 significantly alter the lysosomal response and tend to increase autophagic targeting of *Mtb*,  
546 likely via nuclear translocation of TFEB. Furthermore, our findings support two additional  
547 modes of action, particularly associated with Pimozide-mediated activity. Firstly, Fluspirilene  
548 and Pimozide counteract *Mtb*-induced STAT5 phosphorylation, but only Pimozide thereby  
549 reduced the presence of CISH on the *Mtb* phagosome, thus probably regulating its acidification  
550 [54]. Secondly, Pimozide induced measurable ROS/RNS production and its efficacy was  
551 impacted by ROS/RNS inhibitors. Together these mechanisms likely work in concert (**Figure**  
552 **6**) to reduce intracellular bacterial outgrowth and thus could be targeted by adjunct HDT in  
553 difficult to treat intracellular infections such as *Mtb* and *Stm* and likely also related pathogens.

## 554 **Discussion**

555 In this study, we aimed to find new host-directed therapy (HDT) candidate drugs for the  
556 treatment of (drug resistant) TB and other difficult to treat intracellular bacterial infections, and  
557 identified two structural analogues of the diphenylbutylpiperidine-class, Fluspirilene and  
558 Pimozide, with strong efficacy against intracellular *Mtb* and *Stm*. We next validated their HDT  
559 potential in *Mtb* and *Stm* primary human macrophages with either pro- or anti-inflammatory  
560 phenotypes. Importantly, we corroborated their activity against intracellular *Mtb* in a cross-  
561 species non-human model using bronchoalveolar lavage fluid macrophages, which are a rich  
562 source of alveolar macrophages (AM $\phi$ ), the primary target cells for *Mtb*. This cross-species  
563 efficacy underscored functional conservation of host target molecules and independently  
564 validated their effects in human *Mtb* infected cells. Additionally, the strong HDT activity of  
565 Fluspirilene and Pimozide was confirmed also against clinical isolates of multi-drug resistant  
566 (MDR)-*Mtb* strains, and moreover acted in a synergistic and/or additive mode with a  
567 suboptimal dose of Rifampicin. Extracellular bacterial proliferation itself was unaffected by  
568 these compounds, indicating that their targeting of host mechanisms is responsible for their  
569 activity. Furthermore, the high efficacy shown against *Stm*, indicates that these drugs could be  
570 repurposed as treatment against a wider range of intracellular pathogens as already shown for  
571 other HDTs and pathogens [63].

572 Interestingly, we found several modes of action employed by Fluspirilene and  
573 Pimozide, including modulation of the lysosomal response, autophagy, induction of ROS/RNS  
574 production and finally the inhibition of STAT5 with consequently decreased localization of  
575 CISH protein on the *Mtb* phagosome. We postulate that these mechanisms cooperate in concert  
576 via multiple pathways to reduce intracellular bacterial outgrowth. Drugs acting via multiple  
577 effector mechanisms might be desirable over single mechanism of action (MOA), because

578 developing bacterial resistance against multiple host effector mechanisms simultaneously will  
579 be extremely hard to achieve (summarized in **Figure 6**).

580 Fluspirilene and Pimozide are potent inhibitors of several dopamine receptors and  
581 calcium channels and are used clinically to treat psychotic disorders, like schizophrenia,  
582 psychosis and Tourette syndrome [41, 64]. Some antipsychotic drugs have already been shown  
583 to exert (host directed) antimicrobial activity. For example, phenothiazine-derived drugs,  
584 which include Trifluorperazine, as well as butyrophenone derivatives, with Haloperidol as a  
585 well-known example, have therapeutic potential against several pathogens as we and others  
586 have shown previously [22, 26, 65, 66]. The diphenylbutylpiperidine-class of drugs has also  
587 been studied, revealing host-directed effects of Pimozide against both facultative and obligate  
588 intracellular pathogens, *Listeria monocytogenes* and *Toxoplasma gondii* respectively [67, 68].  
589 Also, Fluspirilene has been shown to potentiate antimicrobial activity against several bacteria,  
590 but only in a direct antibiotic manner [69, 70]. Despite these observations, we found no direct  
591 antimicrobial effect of Fluspirilene (or Pimozide) on either *Mtb* or *Stm*. This is likely reconciled  
592 by the fact that Fluspirilene displayed minimum inhibitory concentrations (MICs) of > 80  $\mu\text{M}$   
593 for *E. coli* and *K. pneumoniae* which both belong to the same order as *Stm*, namely  
594 Enterobacterales, whereas in our work we employed significantly lower (10  $\mu\text{M}$ )  
595 concentrations at which strong HDT but no direct anti-bacterial effects were observed [69].

596  
597 Our work suggests that four different host effector mechanisms are likely to play a role  
598 in the treatment-efficacy of Fluspirilene and Pimozide. A first mechanism we demonstrated  
599 was that Fluspirilene and Pimozide activated autophagy in *Mtb*-infected M $\phi$  and increased the  
600 localization of *Mtb* in autophagic vesicles (**Figure 3A**). Although this was not investigated in  
601 further detail, we hypothesize that  $\text{Ca}^{2+}$  signaling could be important to this effector  
602 mechanism. Both Fluspirilene and Pimozide antagonize calcium channel activity and can lower

603 intracellular  $\text{Ca}^{2+}$  levels, thereby inactivating Calpain that leads to the induction of autophagy  
604 [41, 64, 71, 72]. In support of this, a screen of Fluspirilene analogues showed that  $\text{Ca}^{2+}$  channel  
605 inhibition was necessary for their ability to induce autophagy in a neuroglioma cell line, since  
606 analogues that lacked the ability to block  $\text{Ca}^{2+}$  channels lacked autophagy-inducing activity  
607 [71]. Importantly, the host  $\text{Ca}^{2+}$  signaling pathway is also manipulated directly by *Mtb* to inhibit  
608 autophagy [73]. Whether  $\text{Ca}^{2+}$ -related effects also play a role in HDT activity of Fluspirilene  
609 and Pimozide against intracellular *Mtb* and *Stm*, however, remains currently unknown and will  
610 require future studies. Recently, new diphenylbutylpiperidine analogues with stronger  
611 autophagy-inducing capabilities were developed that represent interesting novel HDT for  
612 future studies [74].

613 The second mechanism that Fluspirilene and Pimozide are likely to employ is the  
614 lysosomal response (**Figure 3**). An additional new finding with mechanistic implications was  
615 that treatment with Fluspirilene and Pimozide strongly increased the intranuclear presence of  
616 TFEB (**Figure 3B**). This transcriptional regulator controls a coordinated lysosomal response  
617 [75], as well as autophagy [76]. This ability of Fluspirilene and Pimozide was, to the best of  
618 our knowledge, hitherto unknown. TFEB translocation has been observed for drugs of the  
619 phenothiazine-class including Trifluorperazine [77], suggesting this might represent common  
620 functionality of several different antipsychotic drugs.

621 The third mechanism we uncovered was phagosomal acidification, a process vital in  
622 the host response against intracellular bacteria, which is inhibited by the protein CISH that is  
623 under transcriptional control of STAT5 [54]. This pathway is exploited by *Mtb* which induces  
624 GM-CSF to activate STAT5, leading to enhanced *CISH* expression and consequent V-ATPase  
625 degradation [54]. Although treatment with both Fluspirilene and Pimozide led to a reduction  
626 of nuclear STAT5, we could experimentally confirm the decrease in CISH protein on *Mtb*  
627 containing vesicles only for Pimozide (**Figure 4A and C**). Further research will be needed to



628 further unravel the subtle differences in precise MOAs between Pimozide and Fluspirilene, but  
629 this is beyond the scope of the current work.

630 As a fourth effector mechanism, we found that Pimozide strongly induced ROS/RNS  
631 production. Mechanistically, the efficacy of both Pimozide and Fluspirilene towards  
632 intracellular *Mtb* was inhibited by ROS/RNS inhibitors. Of these two diphenylbutylpiperidines,  
633 only Pimozide is known to induce ROS/RNS production and to inhibit the expression of  
634 antioxidant genes, like catalase, *in vitro* as well as *in vivo* [57, 78]. Interestingly, similar to the  
635 results from Cai, Zhou [57], addition of n-acetyl-cysteine (NAC), a general ROS scavenger,  
636 partly inhibited the Pimozide induced increase in ROS/RNS levels by human macrophages,  
637 and reduced bacterial survival (**Figure 5B and D**). Since multiple signaling pathways could  
638 contribute to the ROS/RNS production caused by Pimozide, we investigated this in more detail.  
639 The respiratory burst induced upon phagocytosis did not seem to be involved since Ebselen, a  
640 NADPH oxidase (NOX) inhibitor [79], did not restore bacterial survival. Because L-NMMA,  
641 selective for nitric oxide synthase (NOS) affected Pimozide's efficacy, a role for nitric oxide  
642 (NO) seems likely. It has become evident that the functions of ROS and NO are intertwined  
643 and that inhibition of one leads to cross-inhibition of the other, supporting this possibility [80,  
644 81].

645 Taken together, we have identified four potential mechanistic effector pathways each  
646 of which is regulated by Fluspirilene and/or Pimozide, and which likely act in concert to reduce  
647 intracellular bacterial outgrowth. Combinatorial treatment regimens using multiple approaches  
648 including HDT as well as anti-bacterial molecules are considered indispensable to eradicating  
649 TB [82]. An interesting finding was that although Fluspirilene and Pimozide displayed additive  
650 effects with a low dose regimen of Rifampicin, this was not observed with Isoniazid. Isoniazid  
651 is a prodrug and requires conversion by the *Mtb* catalase-peroxidase (KatG) enzyme to its  
652 active form, resulting in the production of bacteria-derived reactive species [48, 83]. These



653 radicals have both direct and indirect antimicrobial properties and in the latter case host  
654 ROS/RNS production can lead to the induction of autophagy, which is capable of targeting *Mtb*  
655 [48].

656           Since the continuing rise of global drug resistance will affect the treatment of many  
657 bacterial infections, approaches complementary to bacterial-directed strategies can offer  
658 important supplemental approaches. We have demonstrated the novel HDT potential of two  
659 approved antipsychotic drugs, Fluspirilene and Pimozide, against *Mtb* and *Stm*, two important  
660 but unrelated intracellular pathogens. Our results provide new insights into the molecular and  
661 functional effects of these two diphenylbutylpiperidines on key mechanisms of host defense,  
662 particularly: autophagy, lysosomal acidification, ROS/RNS generation and phagosome  
663 maturation via STAT5/CISH inhibition. We show that Fluspirilene and Pimozide target these  
664 host responses, by similar but subtly different MOAs, which is accompanied by reduced  
665 intracellular outgrowth of *Mtb* and *Stm* in human cells. Based on these findings, we propose  
666 that the class of diphenylbutylpiperidines could be repurposed as novel HDT drugs for both  
667 TB and salmonellosis and further explored as host-directed compounds against other  
668 intracellular pathogens.

## 669 **Figure Legends**

### 670 **Figure 1 – Identification of compounds with autophagy-regulating activity and** 671 **repurposing potential for HDT against *Mtb* and *Stm***

672 **A.** MelJuSo-*Mtb* model-based screening results of the Screen-Well Autophagy library at 10  
673  $\mu\text{M}$  concentration after 24 hours of treatment sorted by effect size on the percentage of infected  
674 cells (DsRed-*Mtb* positive cells) compared to DMSO. Data points display the mean  $\pm$  standard  
675 deviation of 3 replicates. The positive control H-89 and two structural analogues Fluspirilene  
676 and Pimozide are annotated. **B.** MelJuSo-*Mtb* model-based screening results of H-89,  
677 Fluspirilene and Pimozide at 10  $\mu\text{M}$  concentration after 24 hours of treatment on the percentage  
678 of cells compared to DMSO. Data points display the mean of 3 replicates and represent two  
679 independent experiments. Dotted lines indicate DMSO set at 100% and median is shown for  
680 each condition. Statistical significance was tested using a RM one-way ANOVA with  
681 Dunnett's multiple comparison test (\* = p-value <0.05). **C.** CFU assay of M $\phi$ 1 (upper panel)  
682 and M $\phi$ 2 (lower panel) infected with *Mtb* and treated with 10  $\mu\text{M}$  of Fluspirilene, Pimozide,  
683 H-89 as positive control or DMSO at equal v/v for 24 hours. Effect of compound treatments  
684 are shown separate since donors tested were not always identical. Each dot represents a single  
685 donor (7 and 8 for H-89, 8 and 9 for Fluspirilene and 9 and 10 donors for Pimozide were tested  
686 in M $\phi$ 1 and M $\phi$ 2, respectively) and depicts the mean of 3 or 4 replicates. Dotted lines indicate  
687 DMSO set at 100% and median + 95% confidence intervals are shown for every condition.  
688 Statistical significance was tested using Wilcoxon matched-pairs signed rank test with post-  
689 hoc Benjamini-Hochberg correction (right panel) (\* = q-value <0.1). **D.** CFU assay of M $\phi$ 1  
690 (upper panel) and M $\phi$ 2 (lower panel) infected with *Stm* and treated with 10  $\mu\text{M}$  of Fluspirilene,  
691 Pimozide, H-89 as positive control or DMSO at equal v/v for 24 hours. Each dot represents a  
692 single donor (6 donors in total) and depicts the mean of 3 or 4 replicates. Dotted lines indicate  
693 DMSO set at 100% and median + 95% confidence intervals are shown for every condition.

694 Statistical significance was tested using Wilcoxon matched-pairs signed rank test with post-  
695 hoc Benjamini-Hochberg correction (right panel) (\* = q-value <0.1). **E.** *Mtb* growth in liquid  
696 culture during treatment with 10  $\mu$ M of Fluspirilene, Pimozide or DMSO at equal v/v at assay  
697 endpoint, day 10. Rifampicin (20  $\mu$ g/ml) was used as positive control for *Mtb* growth inhibition.  
698 Bars depict mean  $\pm$  standard deviation of 3 replicates. Experiment shown is a representative of  
699 4 independent experiments. Statistical significance of treatment versus DMSO was tested using  
700 a one-way ANOVA with Dunnett's multiple comparisons test (\*\*\*\* = p-value <0.0001). **F.**  
701 *Stm* growth in liquid culture during treatment with 10  $\mu$ M of Fluspirilene, Pimozide or DMSO  
702 at equal v/v. Gentamicin (50  $\mu$ g/ml) was used as positive control for *Stm* growth inhibition.  
703 Bars depict mean  $\pm$  standard deviation of 3 replicates. Experiment shown is a representative of  
704 2 independent experiments. Statistical significance of treatment versus DMSO was tested using  
705 a one-way ANOVA with Dunnett's multiple comparisons test (\*\*\*\* = p-value <0.0001).

706

707 **Figure 2 – Further in depth and translational validation of Fluspirilene and Pimozide**  
708 **HDT activity against intracellular *Mtb***

709 **A.** CFU assay of M $\phi$ 2 infected with MDR-*Mtb* strain Dutch outbreak 2003-1128 (left panel)  
710 or MDR-*Mtb* strain Beijing 16319 (right panel) and treated with 10  $\mu$ M of Fluspirilene,  
711 Pimozide or DMSO at equal v/v for 24 hours. Each dot represents a single donor (6 donors in  
712 total) and depicts the mean of 3 replicates. Dotted lines indicate DMSO set at 100% and median  
713 + 95% confidence intervals are shown for every condition. Statistical significance was tested  
714 using RM one-way ANOVA with Dunnett's multiple comparison test (left panel) (\*\*\*) = p-  
715 value <0.001 and \*\*\*\* = p-value <0.0001) or Wilcoxon matched-pairs signed rank test with  
716 post-hoc Benjamini-Hochberg correction (right panel) (\* = q-value <0.1). **B.** CFU assay of  
717 M $\phi$ 2 infected with *Mtb* and treated with a combination of a suboptimal dose of Rifampicin  
718 (0.05  $\mu$ g/ml) and 10  $\mu$ M of Fluspirilene, Pimozide or DMSO at equal v/v for 24 hours. Bars

719 depict mean  $\pm$  standard deviation of 3 replicates from a representative donor (out of 4 donors  
720 tested), expressed as a percentage of the DMSO control in the absence of Rifampicin. Black  
721 bars represent Fluspirilene, Pimozide or DMSO only, red bars represent the combination with  
722 Rifampicin. Statistical significance was tested using a two-way ANOVA with Tukey's multiple  
723 comparisons test comparing Fluspirilene or Pimozide treatment (in the absence or presence of  
724 Rifampicin) to the corresponding DMSO control (\* = p-value <0.05, \*\* = p-value <0.01, \*\*\*  
725 = p-value <0.001 and \*\*\*\* = p-value <0.0001). **C.** CFU assay of M $\phi$ 2 infected with *Mtb* as in  
726 **B**, but a suboptimal dose of Isoniazid (0.4  $\mu$ g/ml) was used. Bars depict mean  $\pm$  standard  
727 deviation of 3 replicates from a representative donor (out of 3 donors tested), expressed as a  
728 percentage of the DMSO control in the absence of Isoniazid. **D.** Flow cytometry assay  
729 measuring the percentage of *Mtb*-infected cells (left panel), CFU assay (middle panel) and cell  
730 viability assay measuring the percentage of live cells (right panel) of *ex vivo* non-human  
731 primate bronchoalveolar lavage cells enriched for alveolar macrophages (NHP AM $\phi$ ) infected  
732 with DsRed-expressing *Mtb* and treated with 10  $\mu$ M of Fluspirilene, Pimozide or DMSO at  
733 equal v/v for 24 hours. Each dot represents a single NHP donor (3 donors in total) and depicts  
734 the mean of 1 to 2 replicates (left panel), 6 replicates (middle panel) or 3 replicates (right panel),  
735 expressed as a percentage of the DMSO control. Statistical significance was tested using a RM  
736 one-way ANOVA with Dunnett's multiple comparison test (\* = p-value <0.05).

737

738 **Figure 3 – Fluspirilene and Pimozide regulate autophagy, induce a lysosomal response**  
739 **and enhance bacterial presence in autophago(lyso)somes**

740 **A.** Confocal microscopy of DsRed-expressing *Mtb*-infected M $\phi$ 2 treated with 10  $\mu$ M of  
741 Fluspirilene, Pimozide, 1  $\mu$ M Torin-1 or DMSO at equal v/v for 4 hours. 30 min prior to the  
742 experimental endpoint cells were incubated with CYTO-ID to stain for autophagy-related  
743 vesicles, fixed and counterstained for the nucleus using Hoechst 33342. Shown in the left panel

744 are representative images of M $\phi$ 2, while the middle panel displays the quantification of CYTO-  
745 ID positive areas ( $\log_2$ FC CYTO-ID area to DMSO) and the right panel the quantification of  
746 *Mtb* colocalization with CYTO-ID positive vesicles. Scale bar annotates 5  $\mu$ m. Each dot  
747 represents a single donor (4 donors in total) and depicts the mean (middle panel) or mean  $\pm$   
748 standard deviation (right panel) of 3 replicates and with median and 95% confidence intervals  
749 shown (middle panel) or median shown by gray bars (right panel). Statistical significance was  
750 tested using a RM one-way ANOVA with Dunnett's multiple comparison test. **B.** Confocal  
751 microscopy of DsRed-expressing *Mtb*-infected M $\phi$ 2 treated with 10  $\mu$ M of Fluspirilene,  
752 Pimozide, 1  $\mu$ M Torin-1 as positive control or DMSO at equal v/v for 4 hours. Cells were fixed  
753 at the experimental endpoint, permeabilized using 0.1% Triton-X, stained for TFEB and  
754 counterstained for the nucleus and F-actin using Hoechst 33342 and Phalloidin, respectively.  
755 Shown in the left panel are representative images of M $\phi$ 2, while the middle panel shows violin  
756 plots representing all nuclei quantified (n=79, n=64 n=71 and n=56 for DMSO, Torin-1,  
757 Fluspirilene and Pimozide, respectively) of a representative donor with median and  
758 interquartile range indicated and the right panel displays the  $\log_2$ FC of median nuclear TFEB  
759 intensity per donor normalized to DMSO (5 donors in total) with median and 95% confidence  
760 intervals indicated. Scale bar annotates 5  $\mu$ m. Dotted line indicates median of DMSO.  
761 Statistical significance was tested using Kruskal-Wallis test with Dunn's multiple comparison  
762 test (middle panel) (\* = p-value <0.05 and \*\*\*\* = p-value <0.0001) or RM one-way ANOVA  
763 with Dunnett's multiple comparison test (right panel). **C.** Confocal microscopy of DsRed-  
764 expressing *Mtb*-infected M $\phi$ 2 treated with 10  $\mu$ M of Fluspirilene, Pimozide, 1  $\mu$ M Torin-1 or  
765 DMSO at equal v/v for 4 hours. 30 min prior to the experimental endpoint cells were incubated  
766 with LysoTracker Deep Red to stain for acidic vesicles, fixed and counterstained for the nucleus  
767 using Hoechst 33342. Shown in the left panel are representative images of M $\phi$ 2, while the  
768 middle panel displays the quantification of LysoTracker positive areas ( $\log_2$ FC LysoTracker area

769 to DMSO) and the right panel the quantification of *Mtb* colocalization with LysoTracker  
770 positive vesicles. Scale bar annotates 5  $\mu$ m. Each dot represents a single donor (4 donors in  
771 total) and depicts the mean  $\pm$  standard deviation of 3 replicates. Shown are median and 95%  
772 confidence intervals (middle panel) or median by gray bars (right panel). Statistical  
773 significance was tested using a RM one-way ANOVA with Dunnett's multiple comparison  
774 test.

775

776 **Figure 4 – Fluspirilene and Pimozide inhibit STAT5 function and Pimozide additionally**  
777 **reduces the presence of cytokine-inducible SH2-containing protein (CISH) on *Mtb***  
778 **phagosomes**

779 **A.** Confocal microscopy of DsRed-expressing *Mtb*-infected M $\phi$ 2 treated with 10  $\mu$ M of  
780 Fluspirilene, Pimozide or DMSO at equal v/v for 4 hours. Cells were fixed at the experimental  
781 endpoint, permeabilized using 0.1% Triton-X, stained for P-STAT5 and counterstained for the  
782 nucleus and F-actin using Hoechst 33342 and Phalloidin, respectively. Shown in the left panel  
783 are representative images of M $\phi$ 2, while the middle panel shows violin plots representing all  
784 nuclei quantified (n=73, n=77 and n=75 for DMSO, Fluspirilene and Pimozide, respectively)  
785 of a representative donor with median and interquartile range indicated and the right panel  
786 displays the log<sub>2</sub>FC of median nuclear P-STAT5 intensity per donor normalized to DMSO (5  
787 donors in total) with median and 95% confidence intervals indicated. Scale bar annotates 5  $\mu$ m.  
788 Dotted line indicates median of DMSO. Statistical significance was tested using Kruskal-  
789 Wallis test with Dunn's multiple comparison test (middle panel) (\*\* = p-value <0.01, \*\*\* = p-  
790 value <0.001 and \*\*\*\* = p-value <0.0001) or RM one-way ANOVA with Dunnett's multiple  
791 comparison test (\* = p-value <0.05). **B.** M $\phi$ 2 derived from 2 donors were mock- or *Mtb*-  
792 infected and *Mtb*-infected M $\phi$ 2 were subsequently treated with 10  $\mu$ M of Fluspirilene,  
793 Pimozide, GM-CSF (50 ng/ml) as positive control or DMSO at equal v/v for 4 hours. Transcript

794 levels of Cytokine-inducible SH2-containing protein (CISH) were determined in duplicate  
795 using qRT-PCR before (0h baseline) and 4-hour post-infection. Data was normalized to  
796 GAPDH ( $\Delta$ Ct). Each dot represents a single donor and displays the  $\log_2$ FC expression levels  
797 of CISH in response to treatment compared to their respective baseline control (T0) ( $\Delta\Delta$ Ct).  
798 Horizontal lines indicate median expression levels and dotted line indicates the median of *Mtb*-  
799 infected M $\phi$ 2 treated with DMSO. **C.** Confocal microscopy of DsRed-expressing *Mtb*-infected  
800 M $\phi$ 2 treated with 10  $\mu$ M of Fluspirilene, Pimozide or DMSO at equal v/v for 4 hours. Cells  
801 were fixed at the experimental endpoint, permeabilized using 0.1% Triton-X, stained for CISH  
802 and counterstained for the nucleus and F-actin using Hoechst 33342 and Phalloidin,  
803 respectively. Shown in the left panel are representative images of M $\phi$ 2, while the middle panel  
804 shows violin plots representing all bacteria quantified (n=182, n=179 and n=217 for DMSO,  
805 Fluspirilene and Pimozide, respectively) of a representative donor with median and  
806 interquartile range indicated and the right panel displays the  $\log_2$ FC of median CISH integrated  
807 intensity per bacterium per donor normalized to DMSO (5 donors in total) with median and  
808 95% confidence intervals indicated. Scale bar annotates 5  $\mu$ m. Dotted line indicates median of  
809 DMSO. Statistical significance was tested using Kruskal-Wallis test with Dunn's multiple  
810 comparison test (middle panel) (\*\*\*\* = p-value <0.0001) or RM one-way ANOVA with  
811 Dunnett's multiple comparison test (\* = p-value <0.05).

812

813 **Figure 5 – Pimozide induces ROS/RNS production and antioxidants impair bacterial**  
814 **killling by Pimozide as well as Fluspirilene**

815 **A.** M $\phi$ 2 were pulsed for 30 min with 5  $\mu$ M of probe CM-H2DCFDA followed by exposure to  
816 10  $\mu$ M Fluspirilene or Pimozide, 50  $\mu$ M TBHP as positive control, or DMSO at equal v/v.  
817 Production of reactive oxygen species (ROS) was monitored by measuring Fluorescence  
818 intensity (522 nm) over a time course of two hours. Each dot depicts the mean of 3 replicates



819 of a representative donor (7 donors in total). **B.** M $\phi$ 2 were pulsed for 30 min with 5  $\mu$ M of  
820 probe CM-H2DCFDA followed by exposure to 10  $\mu$ M Fluspirilene or Pimozide, 50  $\mu$ M TBHP  
821 as positive control or DMSO at equal v/v for the duration of the experiment (left panel).  
822 Pimozide and DMSO were additionally combined with 5 mM of the antioxidant N-acetyl  
823 cysteine (NAC) (right panel). Each dot represents the area under the curve (AUC) of a single  
824 donor (7 donors in left panel and 9 donors in right panel) and depicts the mean of 3 to 6  
825 replicates. Median with 95% confidence intervals are shown. Statistical significance was tested  
826 using a Wilcoxon matched-pairs signed rank test with post-hoc Benjamini-Hochberg correction  
827 (left panel) (\* = q-value <0.1) or Wilcoxon matched-pairs signed rank test (right panel) (\*\* =  
828 p-value <0.01). **C.** Probe CM-H2DCFDA (5  $\mu$ M) fluorescence measured in the presence of 10  
829  $\mu$ M of Pimozide or DMSO at equal v/v in the absence of cells. Bars display the mean  $\pm$  standard  
830 deviation of 3 replicates and represent the fluorescence intensity measured after 60 min of  
831 incubation in one single experiment. Statistical significance was tested using an unpaired t test  
832 with Welch's correction. **D.** CFU assay of *Mtb*-infected M $\phi$ 2 and treated with 10  $\mu$ M of  
833 Fluspirilene (left panel) or Pimozide (right panel) combined with anti-oxidants (5 mM of NAC,  
834 10  $\mu$ M of MitoTempo, 25  $\mu$ M of Ebselen or 1 mM of L-NMMA) or DMSO at equal v/v for 24  
835 hours. Each dot represents a single donor (7 donors in total) and depicts the mean of 3 to 6  
836 replicates. Dotted lines indicate DMSO set at 100% with median indicated by gray bars.  
837 Statistical significance was tested using a RM one-way ANOVA with Dunnett's multiple  
838 comparison test (\* = p-value <0.05).

839

#### 840 **Figure 6 – Model of the modes of action of Fluspirilene and Pimozide**

841 Both Fluspirilene and Pimozide increased the localization of *Mtb* in autophagy-related vesicles  
842 implying they induce selective autophagy, i.e. xenophagy (I). Although increased ROS/RNS  
843 production was significantly induced by Pimozide only, antioxidants impaired the efficacy of



844 Pimozide and to a lesser extent also Fluspirilene (II). Fluspirilene and Pimozide both inhibited  
845 STAT5 activity and Pimozide consequently reduced CISH localization on the *Mtb* containing  
846 vesicle (III). Lastly, Fluspirilene and to a larger extent Pimozide, increased nuclear TFEB  
847 localization concomitant with an increased lysosomal response (IV). Black arrows indicate the  
848 general process of *Mtb* phagocytosis and subsequent events, white arrows show compound  
849 mediated activation or inhibition of targets and green and red lines depict signaling pathways  
850 and protein interactions with reduced or increased bacterial outgrowth as outcome,  
851 respectively.

## 852 **Supplementary Figure Legends**

### 853 **Supplementary Figure 1 – Effect of ROS/RNS inhibitors on *Mtb* outgrowth**

854 CFU assay of *Mtb*-infected Mφ2 and treated with antioxidants (5 mM of NAC, 10 μM of  
855 MitoTempo, 25 μM of Ebselen or 1 mM of L-NMMA) or DMSO at equal v/v for 24 hours.  
856 Each dot represents a single donor (7 donors in total, as in Figure 6D) and depicts the mean of  
857 3 to 6 replicates. Dotted lines indicate DMSO set at 100% with median indicated by gray bars.  
858 Statistical significance was tested using Wilcoxon matched-pairs signed rank test with post-  
859 hoc Benjamini-Hochberg correction (\* = q-value <0.1).

## 860 **Acknowledgements**

861 We gratefully acknowledge Dr J. Bestebroer (VUMC, Amsterdam, The Netherlands) for  
862 mycobacterial reporter constructs and Dick van Soolingen and Kirsten Kremer (RIVM,  
863 Bilthoven, The Netherlands) for providing the MDR-*Mtb* strains.

864 This project was funded by the European Union's Seventh Programme for research,  
865 technological development and demonstration under grant agreement N° PhagoSys HEALTH-  
866 F4-2008-223451, grants from the Netherlands Organization for Health Research and  
867 Development (ZonMw-TOP grant 91214038) and NWO Domain Applied and Engineering  
868 Sciences (NWO-TTW grant 13259). We acknowledge the support from FAPESP (grant:  
869 2017/03332-5) to CS fellowship. The funders had no role in study design, data collection and  
870 analysis, decision to publish, or preparation of the manuscript.

871

## 872 **Supplementary materials**

873 Table S1: Results of Screen-Well Autophagy Library screen on *Mtb* infected MelJuSo cells  
874 and Table S2: Raw data of confocal microscopy experiments.

875

## 876 **Conflict of interest statement**

877 The authors declare no conflict of interest. The funders had no role in the design of the study,  
878 in the collection, analyses, or interpretation of data, in the writing of the manuscript, or in the  
879 decision to publish the results.

880

## 881 **Author contribution**

882 MTH, CJK, JE, THMO and MCH designed the experiments. MTH, CJK, JE, CS, IG, FV, SV,  
883 KVV, CGE, KD, LW performed the experiments. MTH, CJK and SV processed the  
884 experimental data and MTH, CJK, THMO and MCH contributed to the interpretation of the

885 results. MTH, THMO and MCH wrote the manuscript and designed the figures. FAWV  
886 contributed to the interpretation of the results and reviewed the manuscript. THMO and MCH  
887 supervised the project. All authors approved the final version of the manuscript.

## 888 References

- 889 1. Turner, R.D. and G.H. Bothamley, *Cough and the transmission of tuberculosis*. J Infect Dis, 2015. **211**(9): p. 1367-72.
- 890
- 891 2. WHO, *Global Tuberculosis Report 2020*. World Health Organization, 2020.
- 892 3. Coppola, M. and T.H. Ottenhoff, *Genome wide approaches discover novel Mycobacterium tuberculosis antigens as correlates of infection, disease, immunity and targets for vaccination*. Semin Immunol, 2018. **39**: p. 88-101.
- 893
- 894
- 895 4. Andersen, P. and T.M. Doherty, *The success and failure of BCG - implications for a novel tuberculosis vaccine*. Nat Rev Microbiol, 2005. **3**(8): p. 656-62.
- 896
- 897 5. Gilchrist, J.J., C.A. MacLennan, and A.V. Hill, *Genetic susceptibility to invasive Salmonella disease*. Nat Rev Immunol, 2015. **15**(7): p. 452-63.
- 898
- 899 6. Majowicz, S.E., et al., *The global burden of nontyphoidal Salmonella gastroenteritis*. Clin Infect Dis, 2010. **50**(6): p. 882-9.
- 900
- 901 7. Klemm, E.J., et al., *Emergence of host-adapted Salmonella Enteritidis through rapid evolution in an immunocompromised host*. Nat Microbiol, 2016. **1**: p. 15023.
- 902
- 903 8. TB Alliance Pipeline. Available from: <https://www.tballiance.org/portfolio>.
- 904 9. Conradie, F., et al., *Treatment of Highly Drug-Resistant Pulmonary Tuberculosis*. N Engl J Med, 2020. **382**(10): p. 893-902.
- 905
- 906 10. Alliance, T., *Pretomanid and BPaL Regimen for Treatment of Highly Resistant Tuberculosis*. Oral presentation at Antimicrobial Drugs Advisory Committee, 2019.
- 907
- 908 11. Charyeva, Z., et al., *What works best for ensuring treatment adherence. Lessons from a social support program for people treated for tuberculosis in Ukraine*. Plos One, 2019. **14**(8).
- 909
- 910 12. Machelart, A., et al., *Host-directed therapies offer novel opportunities for the fight against tuberculosis*. Drug Discovery Today, 2017. **22**(8): p. 1250-1257.
- 911
- 912 13. Kaufmann, S.H.E., et al., *Host-directed therapies for bacterial and viral infections*. Nat Rev Drug Discov, 2018. **17**(1): p. 35-56.
- 913
- 914 14. Kilinc, G., et al., *Host-directed therapy to combat mycobacterial infections\**. Immunological Reviews, 2021.
- 915
- 916 15. Nair, S., et al., *The PPE18 of Mycobacterium tuberculosis interacts with TLR2 and activates IL-10 induction in macrophage*. J Immunol, 2009. **183**(10): p. 6269-81.
- 917
- 918 16. Zhou, K.L., et al., *Mycobacterial mannose-capped lipoarabinomannan: a modulator bridging innate and adaptive immunity*. Emerg Microbes Infect, 2019. **8**(1): p. 1168-1177.
- 919
- 920 17. Carranza, C. and L. Chavez-Galan, *Several Routes to the Same Destination: Inhibition of Phagosome-Lysosome Fusion by Mycobacterium tuberculosis*. American Journal of the Medical Sciences, 2019. **357**(3): p. 184-194.
- 921
- 922
- 923 18. Hmama, Z., et al., *Immuno-evasion and immunosuppression of the macrophage by Mycobacterium tuberculosis*. Immunological Reviews, 2015. **264**(1): p. 220-232.
- 924
- 925 19. Ly, A. and J. Liu, *Mycobacterial Virulence Factors: Surface-Exposed Lipids and Secreted Proteins*. Int J Mol Sci, 2020. **21**(11).
- 926
- 927 20. Huang, D. and L. Bao, *Mycobacterium tuberculosis EspB protein suppresses interferon-gamma-induced autophagy in murine macrophages*. J Microbiol Immunol Infect, 2016. **49**(6): p. 859-865.
- 928
- 929
- 930 21. Kuijl, C., et al., *Intracellular bacterial growth is controlled by a kinase network around PKB/AKT1*. Nature, 2007. **450**(7170): p. 725.
- 931
- 932 22. Korbee, C.J., et al., *Combined chemical genetics and data-driven bioinformatics approach identifies receptor tyrosine kinase inhibitors as host-directed antimicrobials*. Nat Commun, 2018. **9**(1): p. 358.
- 933
- 934
- 935 23. Moreira, J.D., et al., *Functional Inhibition of Host Histone Deacetylases (HDACs) Enhances in vitro and in vivo Anti-mycobacterial Activity in Human Macrophages and in Zebrafish*. Front Immunol, 2020. **11**: p. 36.
- 936
- 937

- 938 24. Jayaswal, S., et al., *Identification of Host-Dependent Survival Factors for Intracellular*  
939 *Mycobacterium tuberculosis through an siRNA Screen*. Plos Pathogens, 2010. **6**(4).
- 940 25. Kumar, D., et al., *Genome-wide Analysis of the Host Intracellular Network that Regulates*  
941 *Survival of Mycobacterium tuberculosis*. Cell, 2010. **140**(5): p. 731-743.
- 942 26. Sundaramurthy, V., et al., *Integration of chemical and RNAi multiparametric profiles identifies*  
943 *triggers of intracellular mycobacterial killing*. Cell Host Microbe, 2013. **13**(2): p. 129-42.
- 944 27. van der Vaart, M., et al., *The DNA damage-regulated autophagy modulator DRAM1 links*  
945 *mycobacterial recognition via TLR-MYD88 to autophagic defense [corrected]*. Cell Host  
946 Microbe, 2014. **15**(6): p. 753-67.
- 947 28. Gutierrez, M.G., et al., *Autophagy is a defense mechanism inhibiting BCG and Mycobacterium*  
948 *tuberculosis survival in infected macrophages*. Cell, 2004. **119**(6): p. 753-766.
- 949 29. Gomes, L.C. and I. Dikic, *Autophagy in Antimicrobial Immunity*. Molecular Cell, 2014. **54**(2): p.  
950 224-233.
- 951 30. Singh, S.B., et al., *Human IRGM induces autophagy to eliminate intracellular mycobacteria*.  
952 Science, 2006. **313**(5792): p. 1438-1441.
- 953 31. Harris, J. and J. Keane, *How tumour necrosis factor blockers interfere with tuberculosis*  
954 *immunity*. Clinical and Experimental Immunology, 2010. **161**(1): p. 1-9.
- 955 32. Watson, R.O., P.S. Manzanillo, and J.S. Cox, *Extracellular M. tuberculosis DNA Targets Bacteria*  
956 *for Autophagy by Activating the Host DNA-Sensing Pathway*. Cell, 2012. **150**(4): p. 803-815.
- 957 33. Magee, M.J., et al., *Reduced prevalence of latent tuberculosis infection in diabetes patients*  
958 *using metformin and statins*. European Respiratory Journal, 2019. **53**(3).
- 959 34. Lee, Y.J., et al., *The effect of metformin on culture conversion in tuberculosis patients with*  
960 *diabetes mellitus*. Korean Journal of Internal Medicine, 2018. **33**(5): p. 933-+.
- 961 35. Naicker, N., A. Sigal, and K. Naidoo, *Metformin as Host-Directed Therapy for TB Treatment:*  
962 *Scoping Review*. Frontiers in Microbiology, 2020. **11**.
- 963 36. Guerra-De-Blas, P.D., et al., *Potential Effect of Statins on Mycobacterium tuberculosis*  
964 *Infection*. Journal of Immunology Research, 2018. **2018**.
- 965 37. Shakya, A., H.R. Bhat, and S.K. Ghosh, *Update on Nitazoxanide: A Multifunctional*  
966 *Chemotherapeutic Agent*. Curr Drug Discov Technol, 2018. **15**(3): p. 201-213.
- 967 38. Napier, R.J., et al., *Imatinib-sensitive tyrosine kinases regulate mycobacterial pathogenesis*  
968 *and represent therapeutic targets against tuberculosis*. Cell Host Microbe, 2011. **10**(5): p. 475-  
969 85.
- 970 39. Bruns, H., et al., *Abelson tyrosine kinase controls phagosomal acidification required for killing*  
971 *of Mycobacterium tuberculosis in human macrophages*. J Immunol, 2012. **189**(8): p. 4069-78.
- 972 40. Napier, R.J., et al., *Low doses of imatinib induce myelopoiesis and enhance host anti-microbial*  
973 *immunity*. PLoS Pathog, 2015. **11**(3): p. e1004770.
- 974 41. Gould, R.J., et al., *Antischizophrenic drugs of the diphenylbutylpiperidine type act as calcium*  
975 *channel antagonists*. Proc Natl Acad Sci U S A, 1983. **80**(16): p. 5122-5.
- 976 42. Verreck, F.A., et al., *Phenotypic and functional profiling of human proinflammatory type-1 and*  
977 *anti-inflammatory type-2 macrophages in response to microbial antigens and IFN-gamma-*  
978 *and CD40L-mediated costimulation*. J Leukoc Biol, 2006. **79**(2): p. 285-93.
- 979 43. Schindelin, J., et al., *Fiji: an open-source platform for biological-image analysis*. Nat Methods,  
980 2012. **9**(7): p. 676-82.
- 981 44. McQuin, C., et al., *CellProfiler 3.0: Next-generation image processing for biology*. PLoS Biol,  
982 2018. **16**(7): p. e2005970.
- 983 45. Livak, K.J. and T.D. Schmittgen, *Analysis of relative gene expression data using real-time*  
984 *quantitative PCR and the 2- $\Delta\Delta CT$  method*. methods, 2001. **25**(4): p. 402-408.
- 985 46. Mishra, R., et al., *Targeting redox heterogeneity to counteract drug tolerance in replicating*  
986 *Mycobacterium tuberculosis*. Sci Transl Med, 2019. **11**(518).

- 987 47. Verreck, F.A., et al., *Human IL-23-producing type 1 macrophages promote but IL-10-producing*  
988 *type 2 macrophages subvert immunity to (myco)bacteria*. Proc Natl Acad Sci U S A, 2004.  
989 **101**(13): p. 4560-5.
- 990 48. Kim, J.J., et al., *Host Cell Autophagy Activated by Antibiotics Is Required for Their Effective*  
991 *Antimycobacterial Drug Action*. Cell Host & Microbe, 2012. **11**(5): p. 457-468.
- 992 49. Zhang, L., et al., *Small molecule regulators of autophagy identified by an image-based high-*  
993 *throughput screen*. Proc Natl Acad Sci U S A, 2007. **104**(48): p. 19023-8.
- 994 50. Settembre, C., et al., *TFEB controls cellular lipid metabolism through a starvation-induced*  
995 *autoregulatory loop*. Nature Cell Biology, 2013. **15**(6): p. 647-+.
- 996 51. Di Malta, C., L. Cinque, and C. Settembre, *Transcriptional Regulation of Autophagy:*  
997 *Mechanisms and Diseases*. Front Cell Dev Biol, 2019. **7**: p. 114.
- 998 52. Zhitomirsky, B., et al., *Lysosomotropic drugs activate TFEB via lysosomal membrane*  
999 *fluidization and consequent inhibition of mTORC1 activity*. Cell Death Dis, 2018. **9**(12): p. 1191.
- 1000 53. Nelson, E.A., et al., *The STAT5 inhibitor pimozide decreases survival of chronic myelogenous*  
1001 *leukemia cells resistant to kinase inhibitors*. Blood, 2011. **117**(12): p. 3421-9.
- 1002 54. Queval, C.J., et al., *Mycobacterium tuberculosis Controls Phagosomal Acidification by*  
1003 *Targeting CISH-Mediated Signaling*. Cell Rep, 2017. **20**(13): p. 3188-3198.
- 1004 55. Gillinder, K.R., et al., *Direct targets of pSTAT5 signalling in erythropoiesis*. PLoS One, 2017.  
1005 **12**(7): p. e0180922.
- 1006 56. Lehtonen, A., et al., *Granulocyte-macrophage colony-stimulating factor (GM-CSF)-induced*  
1007 *STAT5 activation and target-gene expression during human monocyte/macrophage*  
1008 *differentiation*. J Leukoc Biol, 2002. **71**(3): p. 511-9.
- 1009 57. Cai, N., et al., *The STAT3 inhibitor pimozide impedes cell proliferation and induces ROS*  
1010 *generation in human osteosarcoma by suppressing catalase expression*. Am J Transl Res, 2017.  
1011 **9**(8): p. 3853-3866.
- 1012 58. Chen, J.J., et al., *Antipsychotic agent pimozide promotes reversible proliferative suppression*  
1013 *by inducing cellular quiescence in liver cancer*. Oncol Rep, 2019. **42**(3): p. 1101-1109.
- 1014 59. Zielke, S., et al., *Loperamide, pimozide, and STF-62247 trigger autophagy-dependent cell death*  
1015 *in glioblastoma cells*. Cell Death Dis, 2018. **9**(10): p. 994.
- 1016 60. Azad, G.K. and R.S. Tomar, *Ebselen, a promising antioxidant drug: mechanisms of action and*  
1017 *targets of biological pathways*. Mol Biol Rep, 2014. **41**(8): p. 4865-79.
- 1018 61. Dikalova, A.E., et al., *Therapeutic targeting of mitochondrial superoxide in hypertension*. Circ  
1019 Res, 2010. **107**(1): p. 106-16.
- 1020 62. Hibbs, J.B., Jr., R.R. Taintor, and Z. Vavrin, *Macrophage cytotoxicity: role for L-arginine*  
1021 *deiminase and imino nitrogen oxidation to nitrite*. Science, 1987. **235**(4787): p. 473-6.
- 1022 63. Czyz, D.M., et al., *Host-directed antimicrobial drugs with broad-spectrum efficacy against*  
1023 *intracellular bacterial pathogens*. mBio, 2014. **5**(4): p. e01534-14.
- 1024 64. Shi, Q., et al., *Mechanisms of Action of Autophagy Modulators Dissected by Quantitative*  
1025 *Systems Pharmacology Analysis*. Int J Mol Sci, 2020. **21**(8).
- 1026 65. Andersson, J.A., et al., *Combating Multidrug-Resistant Pathogens with Host-Directed*  
1027 *Nonantibiotic Therapeutics*. Antimicrob Agents Chemother, 2018. **62**(1).
- 1028 66. Nehme, H., et al., *Antibacterial activity of antipsychotic agents, their association with lipid*  
1029 *nanocapsules and its impact on the properties of the nanocarriers and on antibacterial activity*.  
1030 Plos One, 2018. **13**(1).
- 1031 67. Lieberman, L.A. and D.E. Higgins, *A Small-Molecule Screen Identifies the Antipsychotic Drug*  
1032 *Pimozide as an Inhibitor of Listeria monocytogenes Infection*. Antimicrobial Agents and  
1033 Chemotherapy, 2009. **53**(2): p. 756-764.
- 1034 68. Dittmar, A.J., A.A. Drozda, and I.J. Blader, *Drug Repurposing Screening Identifies Novel*  
1035 *Compounds That Effectively Inhibit Toxoplasma gondii Growth*. Msphere, 2016. **1**(2).



- 1036 69. Hind, C.K., et al., *Evaluation of a Library of FDA-Approved Drugs for Their Ability To Potentiate*  
1037 *Antibiotics against Multidrug-Resistant Gram-Negative Pathogens*. *Antimicrobial Agents and*  
1038 *Chemotherapy*, 2019. **63**(8).
- 1039 70. Cheng, Y.S., et al., *Repurposing Screen Identifies Unconventional Drugs With Activity Against*  
1040 *Multidrug Resistant Acinetobacter baumannii*. *Frontiers in Cellular and Infection*  
1041 *Microbiology*, 2019. **8**.
- 1042 71. Xia, H.G., et al., *Control of basal autophagy by calpain1 mediated cleavage of ATG5*.  
1043 *Autophagy*, 2010. **6**(1): p. 61-66.
- 1044 72. Vucicevic, L., et al., *Mechanisms and therapeutic significance of autophagy modulation by*  
1045 *antipsychotic drugs*. *Cell Stress*, 2018. **2**(11): p. 282-291.
- 1046 73. Garg, R., et al., *Mycobacterium tuberculosis Calcium Pump CtpF Modulates the*  
1047 *Autophagosome in an mTOR-Dependent Manner*. *Front Cell Infect Microbiol*, 2020. **10**: p. 461.
- 1048 74. Chen, G., et al., *Synthesis and SAR study of diphenylbutylpiperidines as cell autophagy*  
1049 *inducers*. *Bioorg Med Chem Lett*, 2011. **21**(1): p. 234-9.
- 1050 75. Sardiello, M., et al., *A gene network regulating lysosomal biogenesis and function*. *Science*,  
1051 2009. **325**(5939): p. 473-7.
- 1052 76. Singh, N., et al., *Antimycobacterial effect of IFNG (interferon gamma)-induced autophagy*  
1053 *depends on HMOX1 (heme oxygenase 1)-mediated increase in intracellular calcium levels and*  
1054 *modulation of PPP3/calcineurin-TFEB (transcription factor EB) axis*. *Autophagy*, 2018. **14**(6): p.  
1055 972-991.
- 1056 77. Zhang, Y., et al., *Rescue of Pink1 Deficiency by Stress-Dependent Activation of Autophagy*. *Cell*  
1057 *Chem Biol*, 2017. **24**(4): p. 471-480 e4.
- 1058 78. Kim, U., et al., *Pimozide Inhibits the Human Prostate Cancer Cells Through the Generation of*  
1059 *Reactive Oxygen Species*. *Frontiers in Pharmacology*, 2020. **10**.
- 1060 79. Smith, S.M., et al., *Ebselen and congeners inhibit NADPH oxidase 2-dependent superoxide*  
1061 *generation by interrupting the binding of regulatory subunits*. *Chem Biol*, 2012. **19**(6): p. 752-  
1062 63.
- 1063 80. Mullebner, A., et al., *Interaction between Mitochondrial Reactive Oxygen Species, Heme*  
1064 *Oxygenase, and Nitric Oxide Synthase Stimulates Phagocytosis in Macrophages*. *Frontiers in*  
1065 *Medicine*, 2018. **4**.
- 1066 81. West, A.P., et al., *TLR signalling augments macrophage bactericidal activity through*  
1067 *mitochondrial ROS*. *Nature*, 2011. **472**(7344): p. 476-U543.
- 1068 82. Young, C., G. Walzl, and N. Du Plessis, *Therapeutic host-directed strategies to improve*  
1069 *outcome in tuberculosis*. *Mucosal Immunol*, 2020. **13**(2): p. 190-204.
- 1070 83. Vilcheze, C. and W.R. Jacobs, *The mechanism of isoniazid killing: Clarity through the scope of*  
1071 *genetics*. *Annual Review of Microbiology*, 2007. **61**: p. 35-50.

1072



**A**

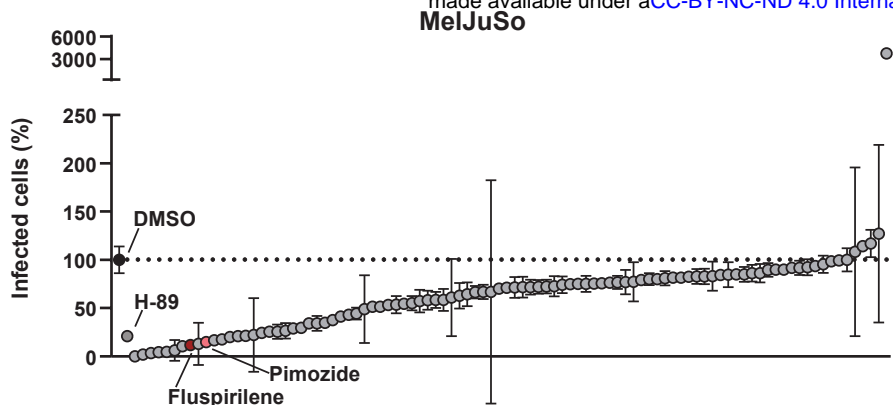

**B**

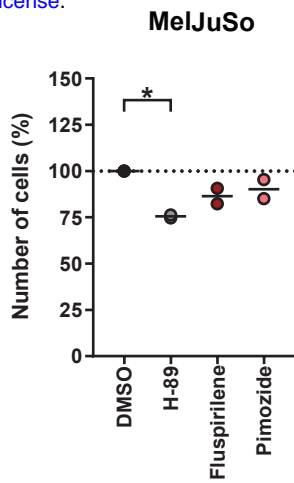

**C**

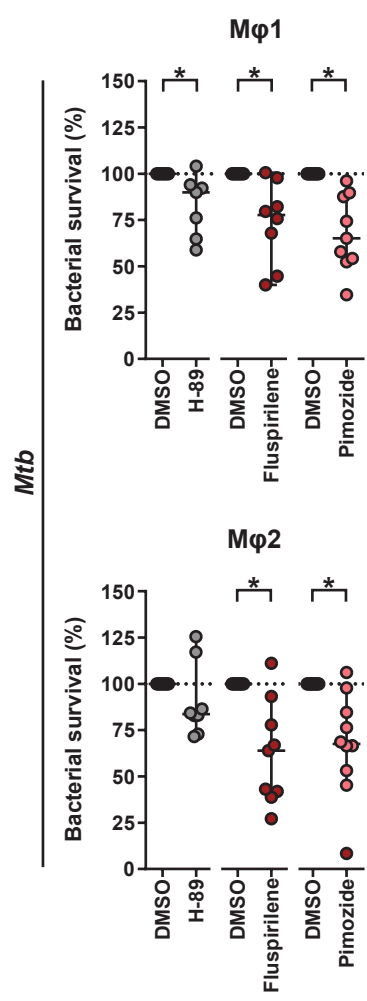

**D**

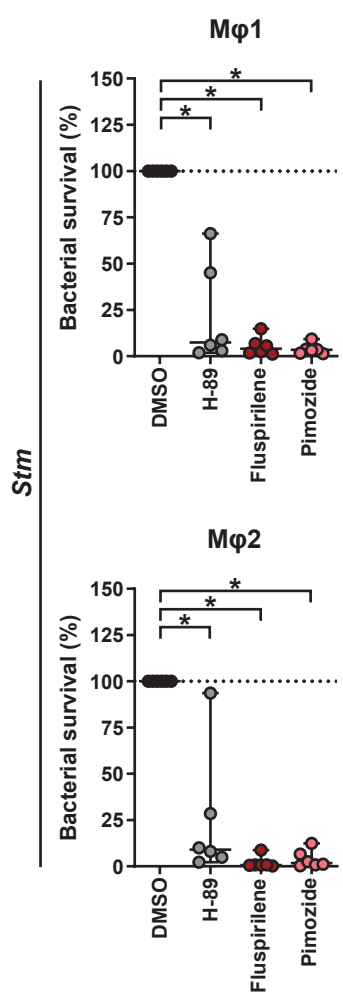

**E**

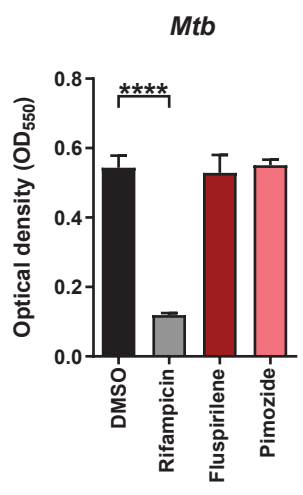

**F**

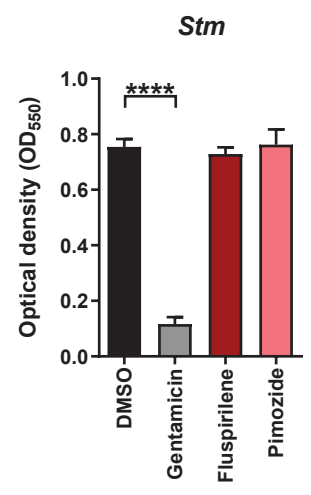

**Figure 1**

**A**

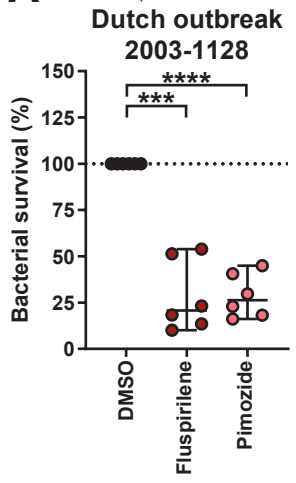

**B**

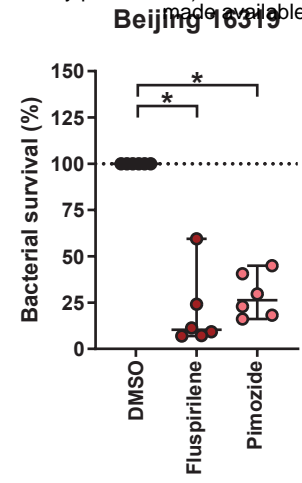

**C**

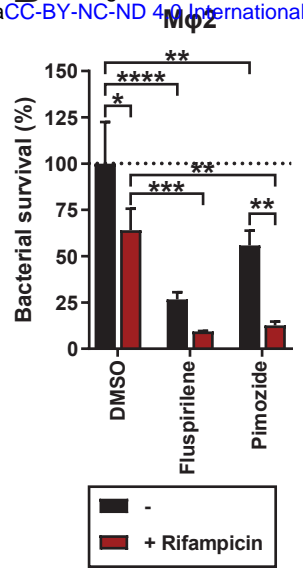

**D**

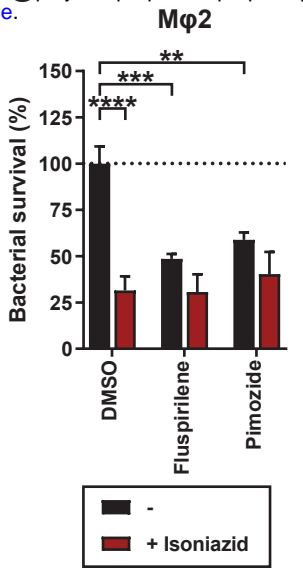

**D**

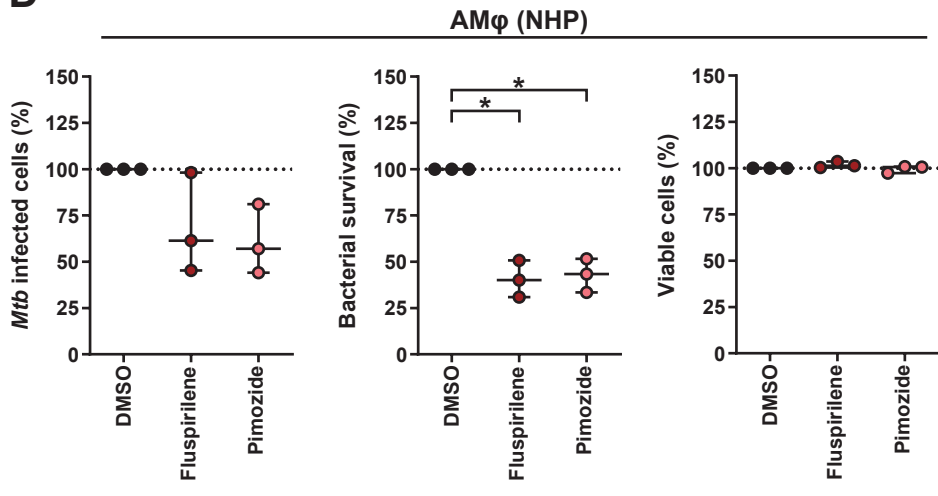

**Figure 2**

**A**

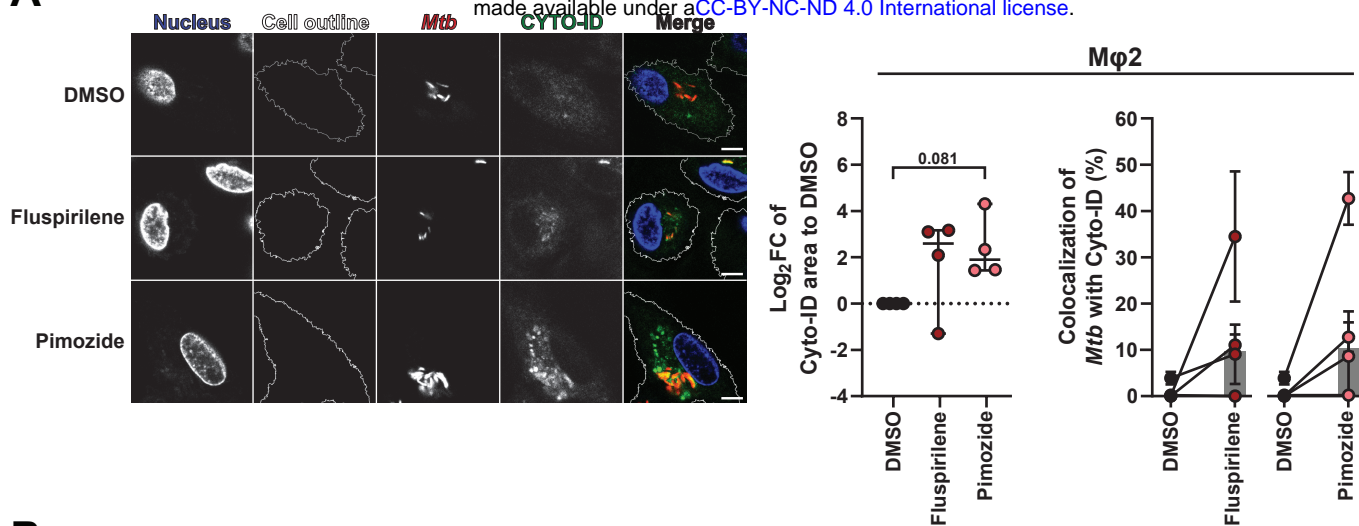

**B**

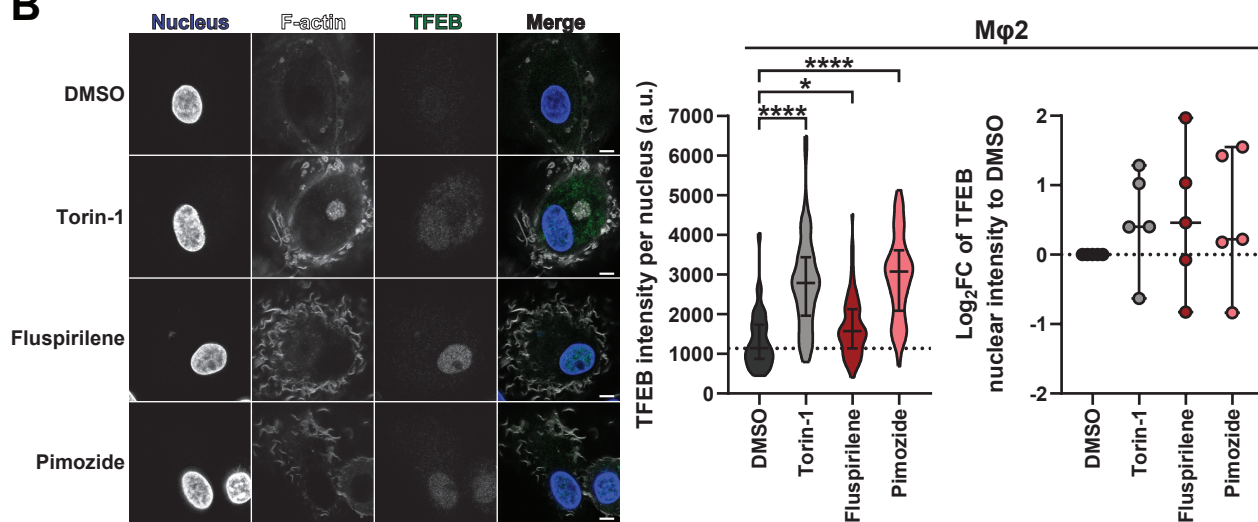

**C**

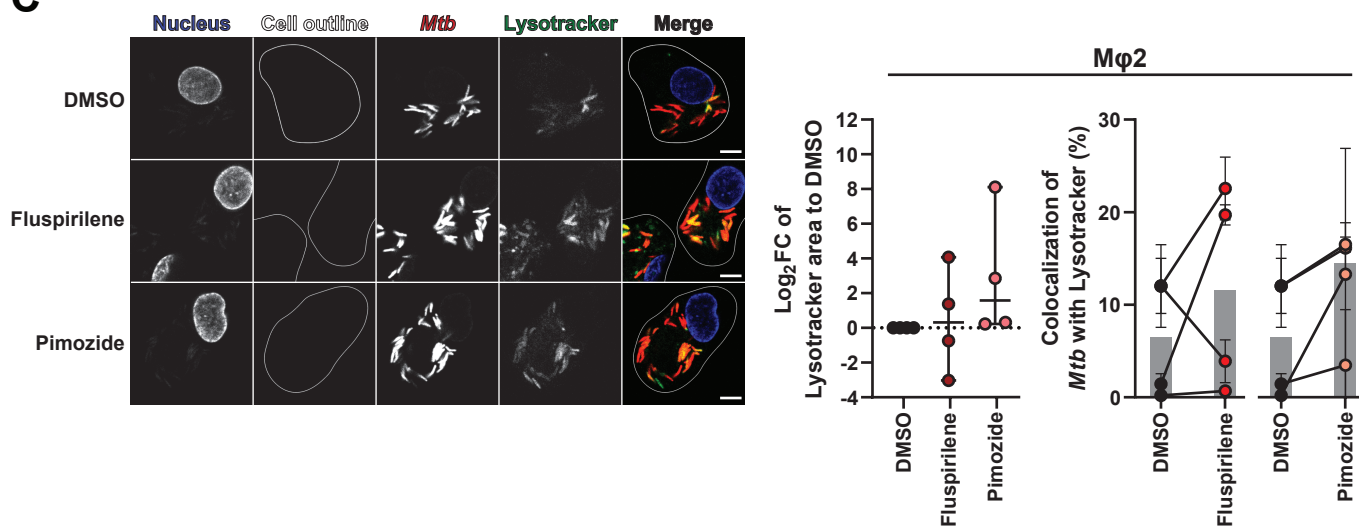

**Figure 3**

**A**

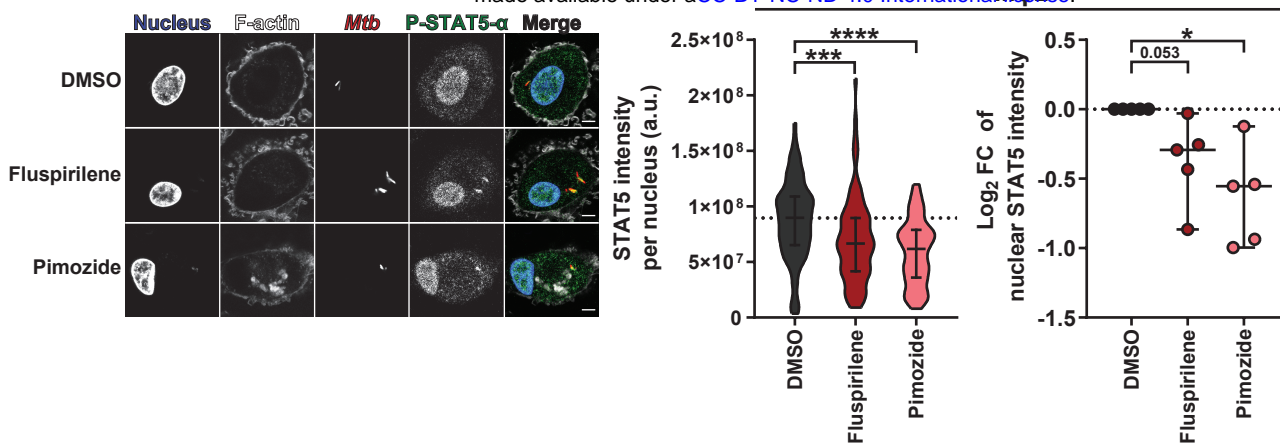

**B**

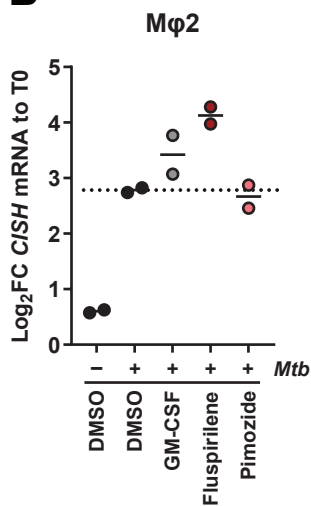

**C**

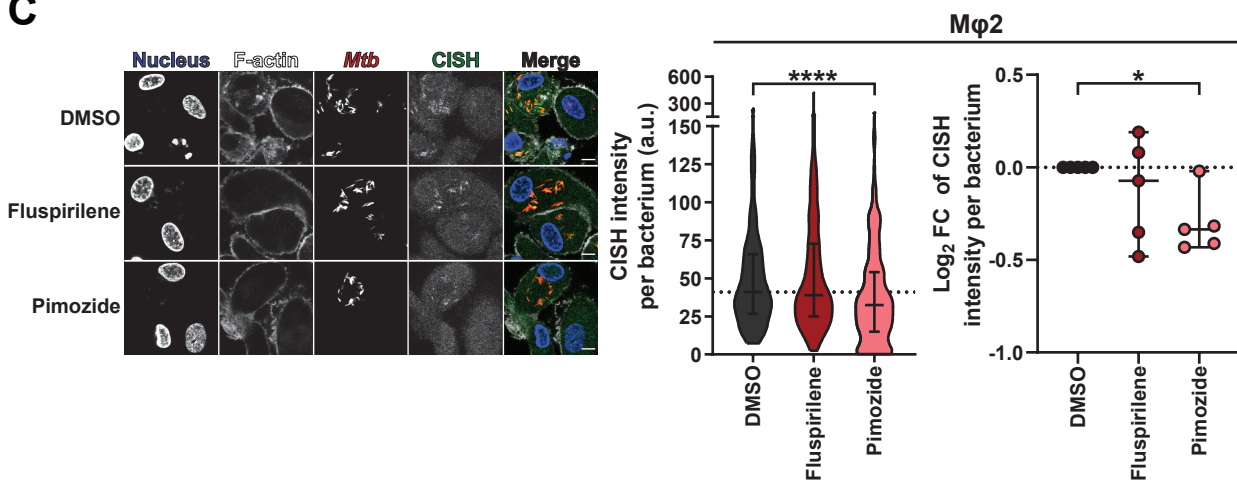

**Figure 4**

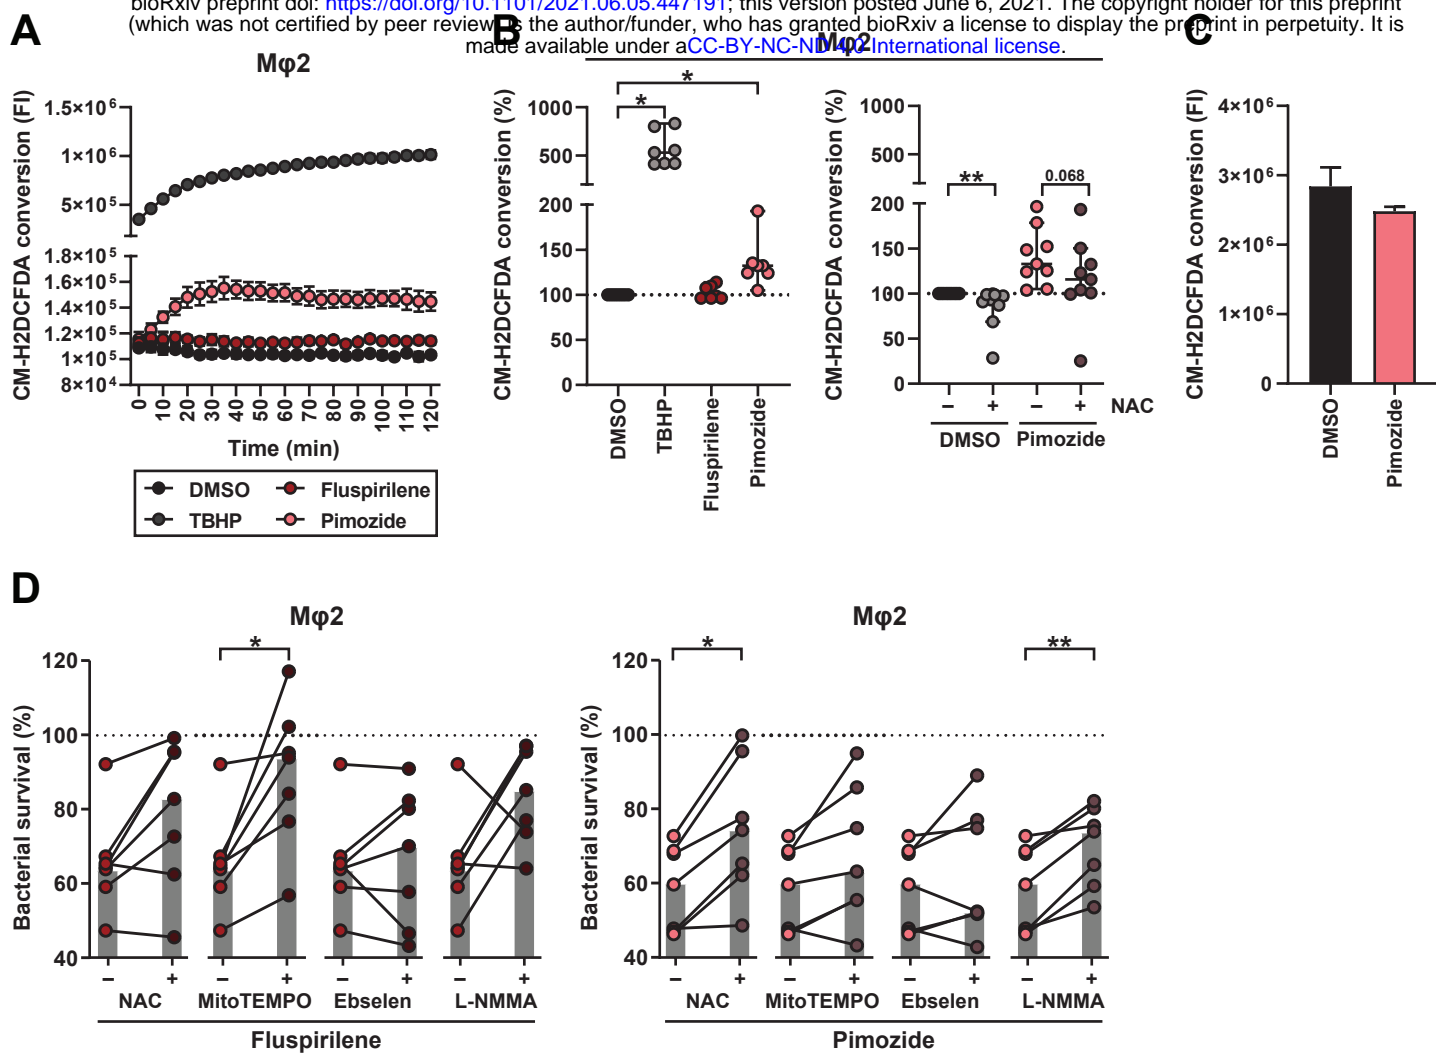

Figure 5

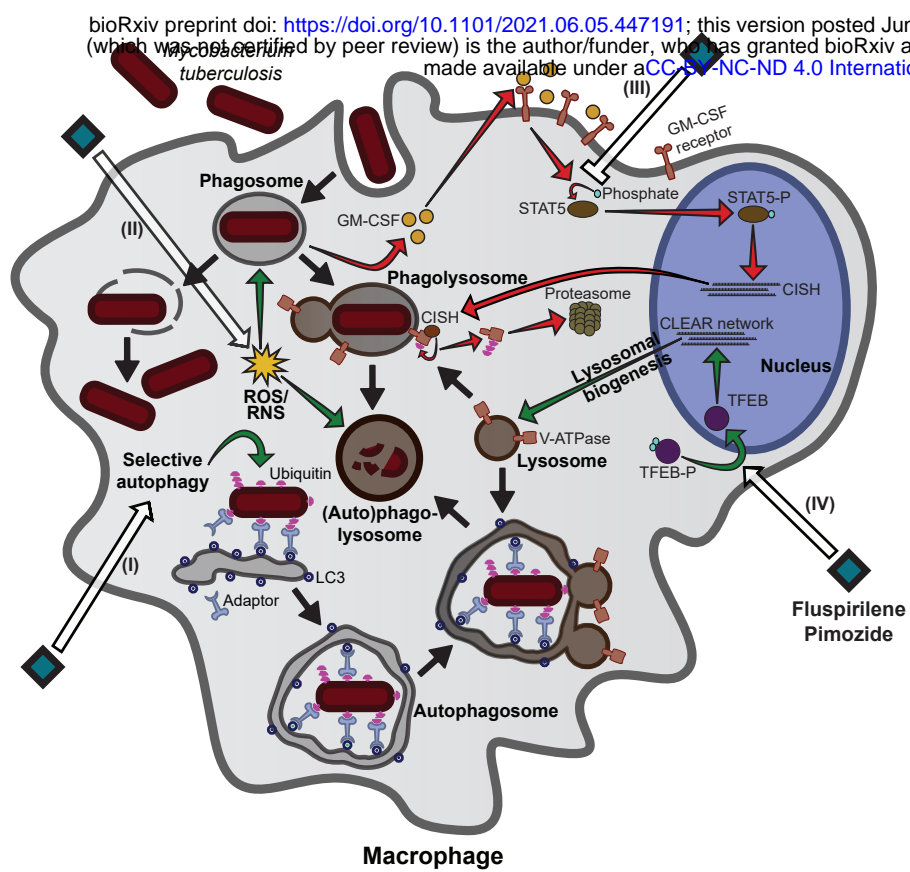

Figure 6

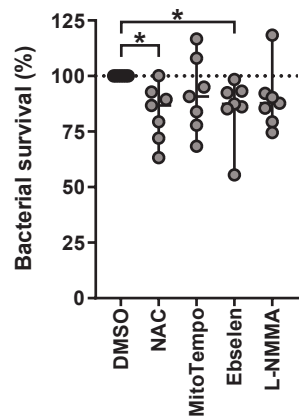

Source: https://www.biorxiv.org/content/biorxiv/early/2021/06/06/2021.06.05.447191.full.pdf
